# Supplementary material for: Quantitative elemental mapping of chondritic meteorites using laser ablation-inductively coupled plasma-time of flight-mass spectrometry (LA-ICP-TOF-MS)
Source: Royal Society of Chemistry journal article supplement (doi:10.1039/d2ja00317a), 2023-01-01
Supplement: d2ja00317a1.pdf [file d2ja00317a1.pdf]

Supplementary Table 1.

Elemental abundances in reference materials as obtained using LA-ICP-TOF-MS mapping (LOD: limit of detection; n.d.: not determined; <LOD: below the LOD).

| Samples | LOD    | BHVO-2G         |       |                               |        | GOR128-G        |      |                               |        | Durango apatite (in-house) |        |                                 |         |
|---------|--------|-----------------|-------|-------------------------------|--------|-----------------|------|-------------------------------|--------|----------------------------|--------|---------------------------------|---------|
|         |        | This work (n=4) |       | Preferred values <sup>1</sup> |        | This work (n=4) |      | Preferred values <sup>2</sup> |        | This work (n=3)            |        | Reference values <sup>3,4</sup> |         |
| (% m/m) |        |                 |       |                               |        |                 |      |                               |        |                            |        |                                 |         |
| Na      | 0.04   | 1.9 ±           | 0.2   | 1.8 ±                         | 0.1    | 0.63 ±          | 0.09 | 0.426 ±                       | 0.019  |                            |        |                                 |         |
| Mg      | 0.01   | 4.1 ±           | 0.6   | 4.30 ±                        | 0.01   | 14 ±            | 1    | 15.7 ±                        | 0.2    | <LOD                       |        | 0.00622 ±                       | 0.00025 |
| Al      | 0.007  | 6.5 ±           | 0.6   | 7.20 ±                        | 0.05   | 4.5 ±           | 0.7  | 5.24 ±                        | 0.09   |                            |        |                                 |         |
| Si      | 0.4    | 25 ±            | 1     | 23.0 ±                        | 0.0    | 24 ±            | 2    | 21.5 ±                        | 0.2    | <LOD                       |        | 0.219 ±                         | 0.008   |
| P       | 0.06   | 0.12 ±          | 0.01  | 0.13 ±                        | 0.01   | <LOD            |      | 0.011 ±                       | 0.002  | 20 ±                       | 1      | 18.7 ±                          | 0.1     |
| K       | 0.01   | 0.33 ±          | 0.09  | 0.42 ±                        | 0.02   | 0.13 ±          | 0.04 | 0.030 ±                       | 0.004  |                            |        |                                 |         |
| Ca      | 0.8    | 6.8 ±           | 0.6   | 8.15 ±                        | 0.07   | 3.7 ±           | 0.3  | 4.46 ±                        | 0.09   | 34 ±                       | 2      | 40.1 ±                          | 0.3     |
| Ti      | 0.003  | 1.5 ±           | 0.1   | 1.67 ±                        | 0.01   | 0.15 ±          | 0.02 | 0.173 ±                       | 0.007  |                            |        |                                 |         |
| Cr      | 0.002  | 0.031 ±         | 0.008 | 0.0293 ±                      | 0.0012 | 0.22 ±          | 0.03 | 0.227 ±                       | 0.017  |                            |        |                                 |         |
| Mn      | 0.0008 | 0.13 ±          | 0.01  | 0.13 ±                        | 0.02   | 0.13 ±          | 0.01 | 0.136 ±                       | 0.007  | 0.0074 ±                   | 0.0006 | 0.00718 ±                       | 0.00027 |
| Fe      | 0.03   | 7.7 ±           | 0.5   | 8.78 ±                        | 0.08   | 7.1 ±           | 0.3  | 7.63 ±                        | 0.09   | <LOD                       |        | 0.0270 ±                        | 0.0010  |
| (µg/g)  |        |                 |       |                               |        |                 |      |                               |        |                            |        |                                 |         |
| Sc      | 10     | 29 ±            | 3     | 33 ±                          | 2      | 29 ±            | 4    | 32.1 ±                        | 1.4    |                            |        |                                 |         |
| V       | 1      | 320 ±           | 10    | 308 ±                         | 19     | 180 ±           | 10   | 189 ±                         | 13     | 29 ±                       | 3      | 20.2 ±                          | 0.7     |
| Co      | 4      | 43 ±            | 5     | 116 ±                         | 7      | 85 ±            | 6    | 92.4 ±                        | 6.2    |                            |        |                                 |         |
| Ni      | 15     | 120 ±           | 30    | 116 ±                         | 7      | 1100 ±          | 100  | 1074 ±                        | 61     |                            |        |                                 |         |
| Cu      | 1      | 120 ±           | 10    | 127 ±                         | 11     | 86 ±            | 24   | 63.8 ±                        | 12.5   |                            |        |                                 |         |
| Zn      | 2      | 97 ±            | 10    | 102 ±                         | 6      | 120 ±           | 30   | 74.7 ±                        | 6.7    |                            |        |                                 |         |
| Rb      | 0.9    | 9.0 ±           | 1.6   | 9.2 ±                         | 0.0    | <2.0            |      | 0.406 ±                       | 0.025  | n.d.                       |        | 0.04 ±                          | 0.01    |
| Sr      | 0.4    | 340 ±           | 30    | 396 ±                         | 1      | 29 ±            | 5    | 30 ±                          | 1      | 490 ±                      | 60     | 516 ±                           | 6       |
| Y       | 0.4    | 18 ±            | 2     | 26 ±                          | 2      | 8.7 ±           | 0.7  | 11.8 ±                        | 0.5    | 1300 ±                     | 100    | 1057 ±                          | 6       |
| Zr      | 0.8    | 160 ±           | 30    | 170 ±                         | 7      | 12 ±            | 2    | 10.0 ±                        | 0.5    |                            |        |                                 |         |
| Nb      | 0.4    | 15 ±            | 1     | 18.3 ±                        | 0.8    | <LOD            |      | 0.099 ±                       | 0.007  |                            |        |                                 |         |
| Ba      | 2      | 120 ±           | 10    | 131 ±                         | 2      | 8.6 ±           | 4.6  | 1.06 ±                        | 0.03   | n.d.                       |        | 1.8 ±                           | 0.2     |
| La      | 0.5    | 12 ±            | 1     | 15.2 ±                        | 0.2    | <LOD            |      | 0.121 ±                       | 0.004  | 5300 ±                     | 300    | 4443 ±                          | 22      |
| Ce      | 0.4    | 33 ±            | 2     | 37.6 ±                        | 0.2    | 1.4 ±           | 0.5  | 0.450 ±                       | 0.016  | 7000 ±                     | 500    | 6066 ±                          | 31      |
| Pr      | 0.2    | 4.0 ±           | 0.2   | 5.35 ±                        | 0.22   | <LOD            |      | 0.100 ±                       | 0.004  | 580 ±                      | 40     | 524 ±                           | 3       |
| Nd      | 0.4    | 19 ±            | 1     | 24.5 ±                        | 0.2    | 0.70 ±          | 0.06 | 0.784 ±                       | 0.047  | 2000 ±                     | 100    | 1770 ±                          | 12      |
| Sm      | 0.2    | 4.6 ±           | 0.5   | 6.10 ±                        | 0.03   | 0.46 ±          | 0.19 | 0.525 ±                       | 0.02   | 290 ±                      | 20     | 256 ±                           | 3       |
| Eu      | 0.2    | 1.4 ±           | 0.1   | 2.07 ±                        | 0.01   | 0.27 ±          | 0.07 | 0.264 ±                       | 0.008  | 24 ±                       | 1      | 22.8 ±                          | 0.4     |
| Gd      | 0.3    | 4.2 ±           | 0.3   | 6.16 ±                        | 0.05   | 0.81 ±          | 0.04 | 1.17 ±                        | 0.04   | 270 ±                      | 30     | 239 ±                           | 2       |
| Tb      | 0.06   | 0.61 ±          | 0.06  | 0.92 ±                        | 0.04   | 0.21 ±          | 0.04 | 0.248 ±                       | 0.012  | 36 ±                       | 3      | 30.4 ±                          | 0.2     |
| Dy      | 0.3    | 3.7 ±           | 0.5   | 5.28 ±                        | 0.05   | 1.5 ±           | 0.2  | 1.98 ±                        | 0.07   | 210 ±                      | 10     | 178 ±                           | 2       |
| Ho      | 0.03   | 0.64 ±          | 0.09  | 0.98 ±                        | 0.04   | 0.36 ±          | 0.04 | 0.443 ±                       | 0.019  | 42 ±                       | 3      | 35.1 ±                          | 0.4     |
| Er      | 0.09   | 1.9 ±           | 0.4   | 2.56 ±                        | 0.02   | 1.2 ±           | 0.2  | 1.40 ±                        | 0.06   | 120 ±                      | 10     | 99.2 ±                          | 1.1     |
| Tm      | 0.08   | 0.25 ±          | 0.05  | 0.34 ±                        | 0.02   | 0.18 ±          | 0.02 | 0.204 ±                       | 0.009  | 14 ±                       | 1      | 12.2 ±                          | 0.2     |
| Yb      | 0.2    | 1.4 ±           | 0.1   | 2.01 ±                        | 0.02   | 1.1 ±           | 0.4  | 1.41 ±                        | 0.06   | 73 ±                       | 5      | 63.2 ±                          | 0.9     |
| Lu      | 0.04   | 0.20 ±          | 0.01  | 0.279 ±                       | 0.003  | 0.19 ±          | 0.05 | 0.206 ±                       | 0.009  | 7.4 ±                      | 0.4    | 6.44 ±                          | 0.14    |
| Hf      | 0.1    | 3.4 ±           | 0.4   | 4.32 ±                        | 0.18   | 0.29 ±          | 0.03 | 0.349 ±                       | 0.017  | n.d.                       |        | 0.04 ±                          | 0.01    |
| Ta      | 0.04   | 0.81 ±          | 0.09  | 1.15 ±                        | 0.10   | <LOD            |      | 0.019 ±                       | 0.001  |                            |        |                                 |         |
| Pb      | 0.3    | 2.4 ±           | 0.3   | 1.7 ±                         | 0.2    | 2.0 ±           | 0.9  | 0.345 ±                       | 0.043  | n.d.                       |        | 0.7 ±                           | 0.1     |
| Th      | 0.05   | 0.94 ±          | 0.17  | 1.22 ±                        | 0.05   | 0.15 ±          | 0.07 | 0.008 ±                       | 0.001  | 490 ±                      | 20     | 412 ±                           | 4       |
| U       | 0.04   | 0.41 ±          | 0.04  | 0.403 ±                       | 0.003  | <LOD            |      | 0.0123 ±                      | 0.0012 | 21 ±                       | 1      | 17.8 ±                          | 0.1     |

The uncertainties reported represent 1SD. LOD values for each analysis point are calculated from the blank intensities in the same analytical session based on the IUPAC approximation formula.<sup>5</sup> The reference values for Mg, Si, P, Ca, V, Mn, and Fe in in-house Durango apatite were obtained using ICP-AES, and those for Sr, Y, REEs, Th, and U were obtained using ICP-Q-MS combined with the isotope dilution method. The reference values for Rb, Ba, and Pb in in-house Durango apatite are from Marks *et al.* (2012),<sup>3</sup> and that for Hf is from Sha and Chappell (1999).<sup>4</sup>

Supplementary Table 2.

Elemental abundances ( $\mu\text{g/g}$ ) in reference samples obtained using LA-ICP-SF-MS spot drilling analysis (LOD: limit of detection).

| Samples | for phosphate analysis |                  |      | for pyroxene analysis |                 |                 |                 | for feldspar and olivine analysis |        |                 |                 | Preferred values <sup>2</sup> |                 |        |          |          |          |          |        |
|---------|------------------------|------------------|------|-----------------------|-----------------|-----------------|-----------------|-----------------------------------|--------|-----------------|-----------------|-------------------------------|-----------------|--------|----------|----------|----------|----------|--------|
|         | LOD                    | ATHO-G           |      | LOD                   | GOR128-G        |                 | GOR132-G        |                                   | LOD    | GOR128-G        |                 | GOR132-G                      |                 | ATHO-G | GOR128-G |          | GOR132-G |          |        |
|         |                        | This work (n=10) |      |                       | This work (n=6) | This work (n=6) | This work (n=6) | This work (n=6)                   |        | This work (n=7) | This work (n=7) | This work (n=7)               | This work (n=7) |        |          |          |          |          |        |
| Sc      |                        |                  | 0.06 | 38 ±                  | 2               | 43 ±            | 2               |                                   |        |                 |                 |                               |                 | 32.1 ± | 1.4      | 36.5 ±   | 1.2      |          |        |
| V       | 0.009                  | 4.4 ±            | 0.8  |                       |                 |                 |                 | 0.06                              | 69 ±   | 9               | 68 ±            | 5                             | 3.91 ±          | 0.34   | 189 ±    | 13       | 214 ±    | 17       |        |
| Zn      |                        |                  | 0.06 | 72 ±                  | 7               | 67 ±            | 5               |                                   |        |                 |                 |                               |                 |        | 74.7 ±   | 6.7      | 76.8 ±   | 12.5     |        |
| Mn      | 0.09                   | 590 ±            | 40   |                       |                 |                 |                 | 0.03                              | 1400 ± | 100             | 1200 ±          | 100                           | 821 ±           | 39     | 1363 ±   | 70       | 1193 ±   | 54       |        |
| Rb      | 0.02                   | 68 ±             | 5    | 0.007                 | 0.35 ±          | 0.05            | 1.9 ±           | 0.1                               | 0.005  | 0.42 ±          | 0.03            | 2.2 ±                         | 0.2             | 65.3 ± | 3        | 0.406 ±  | 0.025    | 2.10 ±   | 0.10   |
| Sr      | 0.006                  | 99 ±             | 8    | 0.002                 | 31 ±            | 2               | 15 ±            | 1                                 | 0.002  | 33 ±            | 2               | 16 ±                          | 1               | 94.1 ± | 2.7      | 30.0 ±   | 1.0      | 15.3 ±   | 0.6    |
| Y       | 0.002                  | 100 ±            | 10   | 0.0009                | 15 ±            | 1               | 16 ±            | 1                                 | 0.001  | 15 ±            | 2               | 16 ±                          | 2               | 94.5 ± | 3.5      | 11.8 ±   | 0.5      | 12.9 ±   | 0.5    |
| Ba      | 0.008                  | 510 ±            | 60   | 0.002                 | 1.0 ±           | 0.1             | 0.78 ±          | 0.14                              | 0.002  | 1.1 ±           | 0.1             | 0.76 ±                        | 0.08            | 547 ±  | 16       | 1.06 ±   | 0.03     | 0.815 ±  | 0.062  |
| La      | 0.0007                 | 62 ±             | 7    | 0.0002                | 0.13 ±          | 0.01            | 0.085 ±         | 0.012                             | 0.0003 | 0.15 ±          | 0.03            | 0.091 ±                       | 0.009           | 55.6 ± | 1.5      | 0.121 ±  | 0.004    | 0.0842 ± | 0.0029 |
| Ce      | 0.0005                 | 130 ±            | 10   | 0.0002                | 0.41 ±          | 0.04            | 0.31 ±          | 0.05                              | 0.0003 | 0.46 ±          | 0.06            | 0.36 ±                        | 0.02            | 121 ±  | 4        | 0.450 ±  | 0.016    | 0.393 ±  | 0.018  |
| Pr      | 0.0006                 | 16 ±             | 2    | 0.0002                | 0.10 ±          | 0.01            | 0.082 ±         | 0.012                             | 0.0003 | 0.11 ±          | 0.01            | 0.091 ±                       | 0.008           | 14.6 ± | 0.4      | 0.100 ±  | 0.004    | 0.089 ±  | 0.004  |
| Nd      | 0.003                  | 71 ±             | 9    | 0.0007                | 0.77 ±          | 0.10            | 0.72 ±          | 0.08                              | 0.0009 | 0.85 ±          | 0.05            | 0.74 ±                        | 0.04            | 60.9 ± | 2.0      | 0.784 ±  | 0.047    | 0.689 ±  | 0.017  |
| Sm      | 0.007                  | 16 ±             | 2    | 0.004                 | 0.51 ±          | 0.10            | 0.50 ±          | 0.11                              | 0.002  | 0.59 ±          | 0.06            | 0.58 ±                        | 0.06            | 14.2 ± | 0.4      | 0.525 ±  | 0.02     | 0.508 ±  | 0.015  |
| Eu      | 0.001                  | 3.0 ±            | 0.3  | 0.0006                | 0.26 ±          | 0.04            | 0.25 ±          | 0.03                              | 0.0007 | 0.28 ±          | 0.02            | 0.26 ±                        | 0.02            | 2.76 ± | 0.1      | 0.264 ±  | 0.008    | 0.255 ±  | 0.007  |
| Gd      | 0.006                  | 18 ±             | 2    | 0.003                 | 1.3 ±           | 0.2             | 1.3 ±           | 0.2                               | 0.002  | 1.4 ±           | 0.1             | 1.4 ±                         | 0.1             | 15.3 ± | 0.7      | 1.17 ±   | 0.04     | 1.19 ±   | 0.04   |
| Tb      | 0.001                  | 2.9 ±            | 0.4  | 0.0005                | 0.28 ±          | 0.04            | 0.30 ±          | 0.04                              | 0.0004 | 0.29 ±          | 0.02            | 0.30 ±                        | 0.03            | 2.51 ± | 0.08     | 0.248 ±  | 0.012    | 0.269 ±  | 0.011  |
| Dy      | 0.01                   | 18 ±             | 3    | 0.004                 | 2.3 ±           | 0.4             | 2.5 ±           | 0.3                               | 0.0009 | 2.4 ±           | 0.2             | 2.5 ±                         | 0.3             | 16.2 ± | 0.7      | 1.98 ±   | 0.07     | 2.15 ±   | 0.06   |
| Ho      | 0.0009                 | 3.9 ±            | 0.6  | 0.0004                | 0.55 ±          | 0.10            | 0.56 ±          | 0.08                              | 0.0005 | 0.52 ±          | 0.04            | 0.57 ±                        | 0.06            | 3.43 ± | 0.11     | 0.443 ±  | 0.019    | 0.507 ±  | 0.019  |
| Er      | 0.002                  | 12 ±             | 2    | 0.0005                | 1.7 ±           | 0.2             | 1.8 ±           | 0.3                               | 0.0009 | 1.7 ±           | 0.2             | 1.9 ±                         | 0.2             | 10.3 ± | 0.5      | 1.40 ±   | 0.06     | 1.56 ±   | 0.05   |
| Tm      | 0.004                  | 1.7 ±            | 0.2  | 0.002                 | 0.23 ±          | 0.05            | 0.27 ±          | 0.05                              | 0.001  | 0.22 ±          | 0.04            | 0.25 ±                        | 0.05            | 1.52 ± | 0.07     | 0.204 ±  | 0.009    | 0.234 ±  | 0.009  |
| Yb      | 0.002                  | 12 ±             | 2    | 0.0006                | 1.5 ±           | 0.3             | 1.8 ±           | 0.3                               | 0.001  | 1.6 ±           | 0.1             | 1.8 ±                         | 0.2             | 10.5 ± | 0.4      | 1.41 ±   | 0.06     | 1.61 ±   | 0.04   |
| Lu      | 0.0009                 | 1.8 ±            | 0.3  | 0.0003                | 0.24 ±          | 0.04            | 0.26 ±          | 0.04                              | 0.0004 | 0.24 ±          | 0.03            | 0.26 ±                        | 0.03            | 1.54 ± | 0.05     | 0.206 ±  | 0.009    | 0.237 ±  | 0.009  |
| Hf      | 0.003                  | 15 ±             | 1    | 0.0008                | 0.38 ±          | 0.08            | 0.38 ±          | 0.08                              | 0.001  | 0.41 ±          | 0.04            | 0.42 ±                        | 0.06            | 13.7 ± | 0.5      | 0.349 ±  | 0.017    | 0.357 ±  | 0.018  |
| Pb      | 0.0008                 | 2.7 ±            | 0.5  | 0.002                 | 0.25 ±          | 0.06            | 18 ±            | 2                                 | 0.002  | 0.27 ±          | 0.06            | 18 ±                          | 3               | 5.67 ± | 0.62     | 0.345 ±  | 0.043    | 19.5 ±   | 1.7    |
| Th      | 0.0007                 | 9.6 ±            | 1.0  | 0.0004                | 0.0060 ±        | 0.0020          | 0.005 ±         | 0.003                             | 0.0005 | 0.0092 ±        | 0.0025          | 0.0080 ±                      | 0.0070          | 7.4 ±  | 0.27     | 0.008 ±  | 0.001    | 0.009 ±  | 0.003  |
| U       | 0.001                  | 2.8 ±            | 0.5  | 0.0001                | 0.013 ±         | 0.003           | 0.031 ±         | 0.006                             | 0.0002 | 0.011 ±         | 0.004           | 0.034 ±                       | 0.013           | 2.37 ± | 0.12     | 0.0123 ± | 0.0012   | 0.048 ±  | 0.005  |

The uncertainties reported represent 1SD. LOD values are calculated from 3SD of the blank intensities in the same analytical session. Where the abundance of an element was below the LOD, the LOD value is substituted instead of the abundance for the average.

Supplementary Table 3.

Elemental abundances in whole areas as obtained using LA-ICP-TOF-MS mapping (&lt;LOD: below the LOD).

| Samples | A 09618 (H5) |       |                        |       | Y-790960 (H7) |       |                        |       | H chondrite mean <sup>6,7</sup> |        |
|---------|--------------|-------|------------------------|-------|---------------|-------|------------------------|-------|---------------------------------|--------|
|         | Whole area   |       | Bulk rock <sup>6</sup> |       | Whole area    |       | Bulk rock <sup>6</sup> |       |                                 |        |
| (% m/m) |              |       |                        |       |               |       |                        |       |                                 |        |
| Na      | 0.65 ±       | 0.20  | 0.59 ±                 | 0.02  | 0.57 ±        | 0.17  | 0.64 ±                 | 0.03  | 0.638 ±                         | 0.012  |
| Mg      | 13 ±         | 4     | 13 ±                   | 0     | 12 ±          | 4     | 15 ±                   | 0     | 14.0 ±                          | 0.1    |
| Al      | 1.0 ±        | 0.3   | 0.88 ±                 | 0.00  | 0.37 ±        | 0.11  | 1.0 ±                  | 0.0   | 1.13 ±                          | 0.03   |
| Si      | 16 ±         | 5     |                        |       | 17 ±          | 5     |                        |       | 17.1 ±                          | 0.26   |
| P       | 0.091 ±      | 0.027 | 0.097 ±                | 0.001 | 0.33 ±        | 0.10  | 0.10 ±                 | 0.00  | 0.118 ±                         | 0.005  |
| K       | 0.11 ±       | 0.03  | 0.068 ±                | 0.001 | 0.090 ±       | 0.027 | 0.071 ±                | 0.001 | 0.0747 ±                        | 0.0033 |
| Ca      | 1.3 ±        | 0.4   | 1.1 ±                  | 0.0   | 0.92 ±        | 0.28  | 0.99 ±                 | 0.01  | 1.24 ±                          | 0.03   |
| Ti      | 0.054 ±      | 0.016 | 0.057 ±                | 0.002 | 0.059 ±       | 0.018 | 0.058 ±                | 0.002 | 0.0719 ±                        | 0.0024 |
| Cr      | 0.17 ±       | 0.05  | 0.37 ±                 | 0.00  | 0.20 ±        | 0.06  | 0.42 ±                 | 0.00  | 0.356 ±                         | 0.008  |
| Mn      | 0.25 ±       | 0.07  | 0.23 ±                 | 0.00  | 0.24 ±        | 0.07  | 0.24 ±                 | 0.00  | 0.240 ±                         | 0.006  |
| Fe      | 29 ±         | 9     | 24 ±                   | 0     | 29 ±          | 9     | 26 ±                   | 0     | 27.5 ±                          | 0.3    |
| Ni      | 1.6 ±        | 0.5   | 1.5 ±                  | 0.0   | 2.3 ±         | 0.7   | 1.7 ±                  | 0.1   | 1.74 ±                          | 0.04   |
| (µg/g)  |              |       |                        |       |               |       |                        |       |                                 |        |
| Sc      | <LOD         |       |                        |       | 12 ±          | 3     |                        |       | 7.9                             |        |
| V       | 54 ±         | 16    |                        |       | 53 ±          | 16    |                        |       | 74                              |        |
| Co      | 740 ±        | 200   | 750 ±                  | 10    | 1100 ±        | 300   | 760 ±                  | 0     | 810                             |        |
| Cu      | 160 ±        | 50    | 79.0 ±                 | 0.0   | 300 ±         | 90    | 84.5 ±                 | 1.9   | 82                              |        |
| Zn      | 130 ±        | 40    | 48.4 ±                 | 0.1   | 110 ±         | 30    | 64.6 ±                 | 1.1   | 47                              |        |
| Rb      | 2.2 ±        | 0.7   | 1.94 ±                 | 0.02  | 2.8 ±         | 0.9   | 2.61 ±                 | 0.18  | 2.9                             |        |
| Sr      | 7.5 ±        | 2.3   | 8.06 ±                 | 0.02  | 5.5 ±         | 1.7   | 8.72 ±                 | 0.15  | 10                              |        |
| Y       | 1.2 ±        | 0.4   | 1.67 ±                 | 0.02  | 1.2 ±         | 0.4   | 1.86 ±                 | 0.04  | 2.20                            |        |
| Zr      | 8.3 ±        | 2.5   | 4.42 ±                 | 0.01  | 14 ±          | 4     | 4.63 ±                 | 0.15  | 6.30                            |        |
| Nb      | 0.53 ±       | 0.16  | 0.356 ±                | 0.003 | 0.87 ±        | 0.26  | 0.364 ±                | 0.017 | 0.360                           |        |
| Ba      | 3.7 ±        | 1.1   | 2.90 ±                 | 0.03  | 4.4 ±         | 1.3   | 3.07 ±                 | 0.20  | 4.2                             |        |
| (ng/g)  |              |       |                        |       |               |       |                        |       |                                 |        |
| La      | 1400 ±       | 400   | 278 ±                  | 4     | <LOD          |       | 307 ±                  | 15    | 309 ±                           | 26     |
| Ce      | 2100 ±       | 600   | 707 ±                  | 8     | 5500 ±        | 1700  | 777 ±                  | 20    | 816 ±                           | 68     |
| Pr      | 240 ±        | 70    | 104 ±                  | 2     | <LOD          |       | 115 ±                  | 10    |                                 |        |
| Nd      | 860 ±        | 260   | 537 ±                  | 9     | 500 ±         | 150   | 558 ±                  | 27    | 588 ±                           | 37     |
| Sm      | <LOD         |       | 168 ±                  | 5     | <LOD          |       | 183 ±                  | 20    | 189 ±                           | 11     |
| Eu      | <LOD         |       | 67.6 ±                 | 1.1   | <LOD          |       | 67.3 ±                 | 4.3   | 71.5 ±                          | 2.4    |
| Gd      | <LOD         |       | 242 ±                  | 8     | <LOD          |       | 257 ±                  | 6     | 255 ±                           | 14     |
| Tb      | <LOD         |       | 43.9 ±                 | 0.3   | <LOD          |       | 46.7 ±                 | 2.3   |                                 |        |
| Dy      | <LOD         |       | 294 ±                  | 8     | <LOD          |       | 306 ±                  | 5     | 320 ±                           | 17     |
| Ho      | 51 ±         | 15    | 66.2 ±                 | 0.4   | 52 ±          | 16    | 66.9 ±                 | 2.4   |                                 |        |
| Er      | 160 ±        | 50    | 200 ±                  | 8     | 140 ±         | 40    | 208 ±                  | 14    | 210 ±                           | 11     |
| Tm      | <LOD         |       | 30.3 ±                 | 0.2   | <LOD          |       | 31.1 ±                 | 1.1   |                                 |        |
| Yb      | <LOD         |       | 197 ±                  | 4     | <LOD          |       | 205 ±                  | 6     | 207 ±                           | 11     |
| Lu      | <LOD         |       | 30.6 ±                 | 0.7   | <LOD          |       | 29.7 ±                 | 0.6   | 32.0 ±                          | 1.5    |
| Hf      | 220 ±        | 70    | 136 ±                  | 4     | 220 ±         | 70    | 135 ±                  | 2     | 180                             |        |
| Ta      | <LOD         |       | 37.5 ±                 | 13.6  | <LOD          |       | 14.4 ±                 | 1.4   | 22.0                            |        |
| Pb      | 4300 ±       | 1300  | 97.3 ±                 | 4.4   | 2400 ±        | 700   | 71.0 ±                 | 13.4  | 240                             |        |
| Th      | 61 ±         | 18    | 40.0 ±                 | 3.5   | 56 ±          | 17    | 33.4 ±                 | 1.0   | 41.5 ±                          | 17.4   |
| U       | 170 ±        | 50    | 13.0 ±                 | 0.9   | <LOD          |       | 8.47 ±                 | 0.28  | 11.8 ±                          | 6.1    |

The uncertainties reported represent 30% relative uncertainty for whole area. The bulk rock abundances of Ta and Pb in the meteorite samples were determined using the same aliquots and the same analytical procedure for ICP-Q-MS as those used in Maeda *et al.* (2021).<sup>6</sup> The abundances of Sc, V, Ta, and Pb for H chondrite mean are from Wasson and Kallemeyn (1988).<sup>7</sup>

Supplementary Table 4.

Elemental abundances in **merrillite** (TOF: abundances obtained based on LA-ICP-TOF-MS mapping; Spot: average abundances obtained based on EPMA in % m/m and LA-ICP-SF-MS spot analysis in  $\mu\text{g/g}$ ; Min: the minimum abundances for Spot; Max: the maximum abundances for Spot; n: number of analyses and samples used for calculating the average in this study and literature values, respectively; <LOD: below the LOD).

| Meteorite                      | A 09618 (H5) |        |         |       |       |       |   | Y-790960 (H7) |       |         |       |      |       |    | Literature values <sup>8</sup> |        |   |
|--------------------------------|--------------|--------|---------|-------|-------|-------|---|---------------|-------|---------|-------|------|-------|----|--------------------------------|--------|---|
|                                | TOF          | U      | Spot    | U     | Min   | Max   | n | TOF           | U     | Spot    | U     | Min  | Max   | n  | Mean                           | U      | n |
| (% m/m)                        |              |        |         |       |       |       |   |               |       |         |       |      |       |    |                                |        |   |
| F                              |              |        | <LOD    |       | <LOD  | <LOD  | 8 |               |       | <LOD    |       | <LOD | <LOD  | 12 |                                |        |   |
| Na <sub>2</sub> O              | 2.9 ±        | 0.6    | 2.74 ±  | 0.14  | 2.52  | 2.91  | 8 |               |       | 2.84 ±  | 0.15  | 2.62 | 3.09  | 12 | 2.76 ±                         | 0.07   | 7 |
| MgO                            | 4.2 ±        | 0.8    | 3.14 ±  | 0.09  | 2.97  | 3.24  | 8 | 0.53 ±        | 0.11  | 3.17 ±  | 0.11  | 2.98 | 3.31  | 12 | 3.52 ±                         | 0.07   | 7 |
| Al <sub>2</sub> O <sub>3</sub> | 0.62 ±       | 0.12   |         |       |       |       |   |               |       |         |       |      |       |    | 0.04 ±                         | 0.01   | 7 |
| SiO <sub>2</sub>               | 3.6 ±        | 0.7    | <LOD    |       | <LOD  | <LOD  | 8 | 4.3 ±         | 0.9   | <LOD    |       | <LOD | <LOD  | 12 | 0.17 ±                         | 0.13   | 6 |
| P <sub>2</sub> O <sub>5</sub>  | 36 ±         | 7      | 46.4 ±  | 1.2   | 44.2  | 48.3  | 8 | 45 ±          | 9     | 46.0 ±  | 0.7   | 45.1 | 46.8  | 12 | 46.4 ±                         | 0.5    | 7 |
| Cl                             |              |        | 0.03 ±  | 0.02  | <LOD  | 0.06  | 8 |               |       | <LOD    |       | <LOD | <LOD  | 12 | 0.06                           |        | 2 |
| K <sub>2</sub> O               | 0.15 ±       | 0.03   |         |       |       |       |   |               |       |         |       |      |       |    | 0.06 ±                         | 0.01   | 7 |
| CaO                            | 33 ±         | 7      | 47.3 ±  | 0.5   | 46.4  | 47.8  | 8 | 30 ±          | 6     | 47.7 ±  | 0.2   | 47.3 | 47.9  | 12 | 46.5 ±                         | 0.5    | 7 |
| TiO <sub>2</sub>               | 0.0092 ±     | 0.0018 |         |       |       |       |   |               |       |         |       |      |       |    | 0.0292 ±                       | 0.0128 | 6 |
| Cr <sub>2</sub> O <sub>3</sub> | 0.087 ±      | 0.017  |         |       |       |       |   |               |       |         |       |      |       |    | 0.0033 ±                       | 0.0024 | 5 |
| FeO                            | 17 ±         | 3      | 0.69 ±  | 0.67  | 0.23  | 2.29  | 8 | 14 ±          | 3     | 0.52 ±  | 0.21  | 0.30 | 1.08  | 12 | 0.57 ±                         | 0.15   | 7 |
| NiO                            | 1.5 ±        | 0.3    |         |       |       |       |   |               |       |         |       |      |       |    |                                |        |   |
| Total                          | 99.7 ±       | 10.5   | 100.3 ± | 1.4   |       |       |   | 94.8 ±        | 11.3  | 100.2 ± | 0.8   |      |       |    | 100.0 ±                        | 0.7    |   |
| ( $\mu\text{g/g}$ )            |              |        |         |       |       |       |   |               |       |         |       |      |       |    |                                |        |   |
| Sc                             | <LOD         |        |         |       |       |       |   |               |       |         |       |      |       |    | 9.3 ±                          | 3.0    | 7 |
| V                              | 7.8 ±        | 2      | 3.1 ±   | 0.9   | 2.0   | 4.4   | 5 | 68 ±          | 14    | 1.7 ±   | 0.0   | 1.7  | 1.7   | 2  | 3.5 ±                          | 0.8    | 6 |
| Mn                             | 350 ±        | 70     | 215 ±   | 67    | 124   | 277   | 5 | 680 ±         | 140   | 112 ±   | 5     | 106  | 117   | 2  | 271 ±                          | 84     | 6 |
| Co                             | 590 ±        | 120    |         |       |       |       |   |               |       |         |       |      |       |    | 17 ±                           | 12     | 6 |
| Cu                             | 270 ±        | 50     |         |       |       |       |   |               |       |         |       |      |       |    |                                |        |   |
| Zn                             | 150 ±        | 30     |         |       |       |       |   |               |       |         |       |      |       |    |                                |        |   |
| Rb                             | 2.2 ±        | 0.4    | 1.3 ±   | 0.3   | 0.9   | 1.6   | 5 |               |       | 1.9 ±   | 0.3   | 1.6  | 2.2   | 2  | 1.2 ±                          | 0.7    | 5 |
| Sr                             | 30 ±         | 6      | 33 ±    | 1     | 31    | 34    | 5 | 30 ±          | 6     | 32 ±    | 2     | 30   | 34    | 2  | 54 ±                           | 21     | 7 |
| Y                              | 230 ±        | 50     | 322 ±   | 12    | 308   | 336   | 5 | 160 ±         | 30    | 378 ±   | 32    | 349  | 424   | 4  | 270 ±                          | 142    | 7 |
| Zr                             | 2.4 ±        | 0.5    |         |       |       |       |   |               |       |         |       |      |       |    |                                |        |   |
| Nb                             | <LOD         |        |         |       |       |       |   |               |       |         |       |      |       |    | 0.30 ±                         | 0.18   | 6 |
| Ba                             | 7.3 ±        | 1.5    | 0.78 ±  | 0.06  | 0.71  | 0.87  | 5 |               |       | 0.24 ±  | 0.06  | 0.18 | 0.30  | 2  | 7.0 ±                          | 10.3   | 5 |
| La                             | 60 ±         | 12     | 61 ±    | 3     | 58    | 66    | 5 | 29 ±          | 6     | 66 ±    | 5     | 64   | 73    | 4  | 56.8 ±                         | 26.9   | 7 |
| Ce                             | 150 ±        | 30     | 174 ±   | 4     | 171   | 181   | 5 | 100 ±         | 20    | 189 ±   | 8     | 180  | 199   | 4  | 157 ±                          | 74     | 7 |
| Pr                             | 19 ±         | 4      | 24 ±    | 0     | 24    | 25    | 5 | 11 ±          | 2     | 27 ±    | 1     | 26   | 28    | 4  | 22.4 ±                         | 11.4   | 7 |
| Nd                             | 82 ±         | 16     | 119 ±   | 3     | 115   | 121   | 5 | 57 ±          | 11    | 135 ±   | 9     | 129  | 149   | 4  | 104 ±                          | 55     | 7 |
| Sm                             | 25 ±         | 5      | 36 ±    | 1     | 34    | 37    | 5 | 17 ±          | 3     | 41 ±    | 4     | 38   | 47    | 4  | 31.5 ±                         | 17.2   | 7 |
| Eu                             | 1.2 ±        | 0.2    | 1.6 ±   | 0.0   | 1.5   | 1.6   | 5 | 0.70 ±        | 0.14  | 1.6 ±   | 0.2   | 1.4  | 1.7   | 4  | 2.0 ±                          | 0.4    | 7 |
| Gd                             | 30 ±         | 6      | 49 ±    | 2     | 46    | 50    | 5 | 23 ±          | 5     | 57 ±    | 6     | 53   | 65    | 4  | 39.7 ±                         | 23.6   | 7 |
| Tb                             | 5.7 ±        | 1.1    | 8.2 ±   | 0.3   | 7.7   | 8.5   | 5 | 4.0 ±         | 0.8   | 9.8 ±   | 0.7   | 9.1  | 11    | 4  | 7.08 ±                         | 3.98   | 7 |
| Dy                             | 37 ±         | 7      | 56 ±    | 2     | 52    | 58    | 5 | 29 ±          | 6     | 67 ±    | 5     | 63   | 75    | 4  | 46.1 ±                         | 25.4   | 7 |
| Ho                             | 8.1 ±        | 1.6    | 12 ±    | 0     | 11    | 12    | 5 | 5.9 ±         | 1.2   | 14 ±    | 1     | 13   | 16    | 4  | 9.89 ±                         | 5.40   | 7 |
| Er                             | 27 ±         | 5      | 35 ±    | 1     | 33    | 36    | 5 | 18 ±          | 4     | 42 ±    | 4     | 39   | 48    | 4  | 27.8 ±                         | 14.7   | 7 |
| Tm                             | 3.2 ±        | 0.6    | 4.7 ±   | 0.1   | 4.5   | 4.9   | 5 | 2.5 ±         | 0.5   | 5.7 ±   | 0.5   | 5.2  | 6.4   | 4  | 3.75 ±                         | 1.78   | 7 |
| Yb                             | 19 ±         | 4      | 29 ±    | 1     | 28    | 30    | 5 | 15 ±          | 3     | 34 ±    | 3     | 32   | 38    | 4  | 23.0 ±                         | 10.2   | 7 |
| Lu                             | 2.9 ±        | 0.6    | 4.0 ±   | 0.1   | 3.8   | 4.1   | 5 | 2.1 ±         | 0.4   | 4.8 ±   | 0.3   | 4.4  | 5.1   | 4  | 3.20 ±                         | 1.29   | 7 |
| Hf                             | <LOD         |        | 0.005 ± | 0.002 | 0.003 | 0.006 | 5 |               |       | 0.005 ± | 0.002 | <LOD | 0.008 | 2  | 0.083 ±                        | 0.101  | 5 |
| Ta                             | 0.059 ±      | 0.012  |         |       |       |       |   |               |       |         |       |      |       |    | 0.010 ±                        | 0.008  | 5 |
| Pb                             | 34 ±         | 7      | 0.53 ±  | 0.08  | 0.42  | 0.65  | 5 |               |       | 0.72 ±  | 0.08  | 0.66 | 0.85  | 4  | 1.62 ±                         | 0.89   | 4 |
| Th                             | 0.36 ±       | 0.07   | 3.6 ±   | 3.0   | 1.4   | 7.0   | 5 | 0.84 ±        | 0.17  | 2.8 ±   | 0.4   | 2.3  | 3.3   | 4  | 1.91 ±                         | 1.43   | 7 |
| U                              | 0.049 ±      | 0.010  | 0.16 ±  | 0.07  | 0.09  | 0.27  | 5 | 0.084 ±       | 0.017 | 0.12 ±  | 0.09  | 0.02 | 0.23  | 4  | 0.27 ±                         | 0.14   | 7 |

The uncertainties reported represent 20% relative uncertainty and 1SD for TOF and Spot, respectively. Where the number of analyses used for the average is two, the uncertainties reflect the range of the two values used for the average. Literature values and their uncertainties represent the mean values of merrillite in ordinary chondrites and the 95% confidence interval, respectively, calculated excluding anomalously high abundances.<sup>8</sup> Values with more than 100% relative

uncertainty are shown in red. LOD values for EPMA are 3SD of the blank intensities in % m/m: 0.12 for F, 0.07 for Na<sub>2</sub>O, 0.05 for MgO, 0.05 for SiO<sub>2</sub>, 0.12 for P<sub>2</sub>O<sub>5</sub>, 0.02 for Cl, 0.02 for CaO, and 0.08 for FeO. Where the abundance of an element was below the LOD for Spot, the LOD value is substituted instead of the abundance for the average unless every analysis is below the LOD.

Supplementary Table 5.

Elemental abundances in **apatite** (TOF: abundances obtained based on LA-ICP-TOF-MS mapping; Spot: average abundances obtained based on EPMA in % m/m and LA-ICP-SF-MS spot analysis in  $\mu\text{g/g}$ ; Min: the minimum abundances for Spot; Max: the maximum abundances for Spot; n: number of analyses and samples used for calculating the average in this study and literature values, respectively; <LOD: below the LOD).

| Meteorite                      | A 09618 (H5) |        |         |       |       |       |   | Y-790960 (H7) |       |         |       |      |       | Literature values <sup>8</sup> |          |        |   |
|--------------------------------|--------------|--------|---------|-------|-------|-------|---|---------------|-------|---------|-------|------|-------|--------------------------------|----------|--------|---|
|                                | TOF          | U      | Spot    | U     | Min   | Max   | n | TOF           | U     | Spot    | U     | Min  | Max   | n                              | Mean     | U      | n |
| (% m/m)                        |              |        |         |       |       |       |   |               |       |         |       |      |       |                                |          |        |   |
| F                              |              |        | 0.62 ±  | 0.13  | 0.48  | 0.82  | 7 |               |       | 0.32 ±  | 0.14  | <LOD | 0.47  | 12                             | 0.44 ±   | 0.19   | 6 |
| Na <sub>2</sub> O              | 0.78 ±       | 0.16   | 0.35 ±  | 0.06  | 0.28  | 0.45  | 7 |               |       | 0.35 ±  | 0.06  | 0.23 | 0.44  | 12                             | 0.35 ±   | 0.09   | 6 |
| MgO                            | 0.51 ±       | 0.10   | <LOD    |       | <LOD  | <LOD  | 7 | 0.21 ±        | 0.04  | <LOD    |       | <LOD | <LOD  | 12                             | 0.06 ±   | 0.02   | 6 |
| Al <sub>2</sub> O <sub>3</sub> | 0.36 ±       | 0.07   |         |       |       |       |   |               |       |         |       |      |       |                                | 0.04 ±   | 0.02   | 6 |
| SiO <sub>2</sub>               | 2.1 ±        | 0.4    | 0.09 ±  | 0.01  | 0.07  | 0.11  | 7 | 2.7 ±         | 0.5   | 0.09 ±  | 0.03  | <LOD | 0.14  | 12                             | 0.15 ±   | 0.18   | 5 |
| P <sub>2</sub> O <sub>5</sub>  | 36 ±         | 7      | 40.8 ±  | 1.3   | 38.3  | 41.9  | 7 | 40 ±          | 8     | 41.2 ±  | 0.9   | 39.9 | 42.7  | 12                             | 41.1 ±   | 0.8    | 6 |
| Cl                             |              |        | 4.92 ±  | 0.38  | 4.25  | 5.30  | 7 |               |       | 5.74 ±  | 0.36  | 5.20 | 6.24  | 12                             | 5.45 ±   | 0.42   | 6 |
| K <sub>2</sub> O               | 0.065 ±      | 0.013  |         |       |       |       |   |               |       |         |       |      |       |                                | 0.03     |        | 6 |
| CaO                            | 41 ±         | 8      | 54.5 ±  | 0.8   | 53.3  | 55.4  | 7 | 39 ±          | 8     | 54.5 ±  | 0.7   | 52.9 | 55.6  | 12                             | 53.1 ±   | 0.6    | 6 |
| TiO <sub>2</sub>               | 0.0095 ±     | 0.0019 |         |       |       |       |   |               |       |         |       |      |       |                                | 0.0423 ± | 0.0405 | 5 |
| Cr <sub>2</sub> O <sub>3</sub> | 0.0050 ±     | 0.0010 |         |       |       |       |   |               |       |         |       |      |       |                                | 0.0241 ± | 0.0256 | 6 |
| FeO                            | 18 ±         | 4      | 0.73 ±  | 0.57  | 0.27  | 1.84  | 7 | 13 ±          | 3     | 0.56 ±  | 0.54  | 0.20 | 1.94  | 12                             | 0.46 ±   | 0.33   | 6 |
| NiO                            | 1.1 ±        | 0.2    |         |       |       |       |   |               |       |         |       |      |       |                                |          |        |   |
| Total                          | 99.8 ±       | 11.5   | 101.9 ± | 1.7   |       |       |   | 94.9 ±        | 11.5  | 102.8 ± | 1.3   |      |       |                                | 101.2 ±  | 1.1    |   |
| X-site                         |              |        |         |       |       |       |   |               |       |         |       |      |       |                                |          |        |   |
| X <sub>F</sub>                 |              |        | 0.17 ±  | 0.04  | 0.13  | 0.22  | 7 |               |       | 0.09 ±  | 0.04  | 0.03 | 0.12  | 11                             |          |        |   |
| X <sub>Cl</sub>                |              |        | 0.72 ±  | 0.06  | 0.61  | 0.80  | 7 |               |       | 0.84 ±  | 0.06  | 0.76 | 0.92  | 11                             |          |        |   |
| X <sub>other</sub>             |              |        | 0.11 ±  | 0.06  | 0.03  | 0.17  | 7 |               |       | 0.08 ±  | 0.04  | 0.03 | 0.18  | 11                             |          |        |   |
| ( $\mu\text{g/g}$ )            |              |        |         |       |       |       |   |               |       |         |       |      |       |                                |          |        |   |
| Sc                             | <LOD         |        |         |       |       |       |   |               |       |         |       |      |       |                                | 5.0 ±    | 2.4    | 6 |
| V                              | 1.5 ±        | 0.3    | 0.22 ±  | 0.03  | 0.22  | 0.22  | 1 | 33 ±          | 7     | 0.36 ±  | 0.48  | 0.05 | 0.92  | 3                              | 16.1 ±   | 19.6   | 6 |
| Mn                             | 470 ±        | 90     | 138 ±   | 21    | 138   | 138   | 1 | 560 ±         | 110   | 160 ±   | 51    | 130  | 219   | 3                              | 531 ±    | 518    | 6 |
| Co                             | 530 ±        | 100    |         |       |       |       |   |               |       |         |       |      |       |                                | 11.0 ±   | 8.0    | 5 |
| Cu                             | 61 ±         | 12     |         |       |       |       |   |               |       |         |       |      |       |                                |          |        |   |
| Zn                             | 140 ±        | 30     |         |       |       |       |   |               |       |         |       |      |       |                                |          |        |   |
| Rb                             | 1.4 ±        | 0.3    | 0.12 ±  | 0.09  | 0.07  | 0.22  | 3 |               |       | 0.08 ±  | 0.08  | 0.03 | 0.17  | 3                              | 0.8 ±    | 0.5    | 5 |
| Sr                             | 79 ±         | 16     | 94 ±    | 5     | 90    | 100   | 4 | 80 ±          | 16    | 107 ±   | 4     | 102  | 110   | 3                              | 145 ±    | 87     | 5 |
| Y                              | 14 ±         | 3      | 21 ±    | 14    | 14    | 42    | 4 | 6.0 ±         | 1.2   | 18 ±    | 1     | 17   | 19    | 3                              | 21 ±     | 11     | 6 |
| Zr                             | 4.5 ±        | 0.9    |         |       |       |       |   |               |       |         |       |      |       |                                | 5.2 ±    | 2.6    | 5 |
| Nb                             | <LOD         |        |         |       |       |       |   |               |       |         |       |      |       |                                | 0.30 ±   | 0.43   | 5 |
| Ba                             | 4.3 ±        | 0.9    | 1.1 ±   | 0.4   | 0.8   | 1.6   | 3 |               |       | 0.73 ±  | 0.14  | 0.58 | 0.85  | 3                              | 3.6 ±    | 4.9    | 5 |
| La                             | 16 ±         | 3      | 15 ±    | 5     | 12    | 22    | 4 | 4.6 ±         | 0.9   | 13 ±    | 1     | 12   | 14    | 3                              | 15.0 ±   | 8.6    | 6 |
| Ce                             | 32 ±         | 6      | 29 ±    | 10    | 23    | 44    | 4 | 17 ±          | 3     | 24 ±    | 1     | 23   | 24    | 3                              | 30.2 ±   | 14.6   | 6 |
| Pr                             | 2.9 ±        | 0.6    | 3.5 ±   | 1.3   | 2.7   | 5.3   | 4 | 1.1 ±         | 0.2   | 3.0 ±   | 0.1   | 2.9  | 3.1   | 3                              | 3.59 ±   | 1.78   | 6 |
| Nd                             | 11 ±         | 2      | 14 ±    | 6     | 11    | 23    | 4 | 4.5 ±         | 0.9   | 13 ±    | 1     | 12   | 14    | 3                              | 14.3 ±   | 7.5    | 6 |
| Sm                             | 1.5 ±        | 0.3    | 3.4 ±   | 1.6   | 2.5   | 5.7   | 4 | 1.1 ±         | 0.2   | 3.1 ±   | 0.3   | 2.9  | 3.5   | 3                              | 3.31 ±   | 1.75   | 6 |
| Eu                             | 0.70 ±       | 0.14   | 0.93 ±  | 0.09  | 0.85  | 1.1   | 4 | 0.48 ±        | 0.10  | 1.1 ±   | 0.1   | 1.0  | 1.1   | 3                              | 1.13 ±   | 0.42   | 6 |
| Gd                             | 2.8 ±        | 0.6    | 4.1 ±   | 2.1   | 2.8   | 7.1   | 4 | 1.2 ±         | 0.2   | 3.6 ±   | 0.2   | 3.3  | 3.7   | 3                              | 3.75 ±   | 2.10   | 6 |
| Tb                             | 0.41 ±       | 0.08   | 0.63 ±  | 0.35  | 0.43  | 1.2   | 4 | 0.18 ±        | 0.04  | 0.55 ±  | 0.02  | 0.53 | 0.57  | 3                              | 0.56 ±   | 0.33   | 6 |
| Dy                             | 2.2 ±        | 0.4    | 4.0 ±   | 2.3   | 2.5   | 7.4   | 4 | 1.1 ±         | 0.2   | 3.4 ±   | 0.1   | 3.4  | 3.5   | 3                              | 3.56 ±   | 2.10   | 6 |
| Ho                             | 0.48 ±       | 0.10   | 0.79 ±  | 0.45  | 0.52  | 1.5   | 4 | 0.24 ±        | 0.05  | 0.73 ±  | 0.07  | 0.68 | 0.80  | 3                              | 0.77 ±   | 0.41   | 6 |
| Er                             | 1.2 ±        | 0.2    | 2.4 ±   | 1.4   | 1.6   | 4.5   | 4 | 0.77 ±        | 0.15  | 2.1 ±   | 0.2   | 2.0  | 2.3   | 3                              | 2.13 ±   | 1.13   | 6 |
| Tm                             | 0.14 ±       | 0.03   | 0.33 ±  | 0.21  | 0.21  | 0.64  | 4 | 0.11 ±        | 0.02  | 0.27 ±  | 0.00  | 0.26 | 0.27  | 3                              | 0.28 ±   | 0.15   | 6 |
| Yb                             | 0.76 ±       | 0.15   | 2.1 ±   | 1.3   | 1.3   | 4.0   | 4 | 0.56 ±        | 0.11  | 1.7 ±   | 0.1   | 1.5  | 1.8   | 3                              | 1.80 ±   | 0.86   | 6 |
| Lu                             | 0.19 ±       | 0.04   | 0.29 ±  | 0.15  | 0.20  | 0.51  | 4 | 0.079 ±       | 0.016 | 0.25 ±  | 0.04  | 0.21 | 0.29  | 3                              | 0.24 ±   | 0.11   | 6 |
| Hf                             | <LOD         |        | 0.025 ± | 0.018 | 0.004 | 0.046 | 4 |               |       | 0.004 ± | 0.001 | <LOD | 0.004 | 2                              | 0.085 ±  | 0.050  | 5 |
| Ta                             | <LOD         |        |         |       |       |       |   |               |       |         |       |      |       |                                | 0.014 ±  | 0.019  | 5 |
| Pb                             | 38 ±         | 8      | 1.4 ±   | 0.7   | 0.9   | 2.4   | 4 |               |       | 1.3 ±   | 0.1   | 1.2  | 1.4   | 3                              | 2.83 ±   | 2.25   | 4 |
| Th                             | 1.6 ±        | 0.3    | 2.7 ±   | 0.2   | 2.4   | 2.9   | 4 | 1.6 ±         | 0.3   | 5.7 ±   | 0.1   | 5.6  | 5.9   | 3                              | 3.74 ±   | 3.20   | 6 |
| U                              | 3.8 ±        | 0.8    | 4.0 ±   | 0.2   | 3.7   | 4.2   | 4 | 2.6 ±         | 0.5   | 4.3 ±   | 0.1   | 4.1  | 4.4   | 3                              | 2.93 ±   | 2.30   | 6 |

The uncertainties reported represent 20% relative uncertainty and 1SD for TOF and Spot, respectively. Where the number

of analyses used for the average is two or one, the uncertainties reflect the range of the two values used for the average or 15% relative uncertainty, respectively. Literature values and their uncertainties represent the mean values of apatite in ordinary chondrites and the 95% confidence interval, respectively, calculated excluding anomalously high abundances.<sup>8</sup> Values with more than 100% relative uncertainty are shown in red. LOD values for EPMA are 3SD of the blank intensities in % m/m: 0.12 for F, 0.07 for Na<sub>2</sub>O, 0.05 for MgO, 0.05 for SiO<sub>2</sub>, 0.12 for P<sub>2</sub>O<sub>5</sub>, 0.02 for Cl, 0.02 for CaO, and 0.08 for FeO. Where the abundance of an element was below the LOD for Spot, the LOD value is substituted instead of the abundance for the average unless every analysis is below the LOD.

Supplementary Table 6.

Elemental abundances in **Ca-rich pyroxene** (TOF: abundances obtained based on LA-ICP-TOF-MS mapping; Spot: average abundances obtained based on EPMA in % m/m and LA-ICP-SF-MS spot analysis in  $\mu\text{g/g}$ ; Min: the minimum abundances for Spot; Max: the maximum abundances for Spot; n: number of analyses and samples used for calculating the average in this study and literature values, respectively; <LOD: below the LOD).

| Meteorite                      | A 09618 (H5) |        |          |        |        |        | Y-790960 (H7) |          |        |          |        | Literature values <sup>9-12</sup> |       |    |          |        |   |
|--------------------------------|--------------|--------|----------|--------|--------|--------|---------------|----------|--------|----------|--------|-----------------------------------|-------|----|----------|--------|---|
|                                | TOF          | Spot   | Min      | Max    | n      | TOF    | Spot          | Min      | Max    | n        | Mean   | n                                 |       |    |          |        |   |
| ( % m/m)                       |              |        |          |        |        |        |               |          |        |          |        |                                   |       |    |          |        |   |
| Na <sub>2</sub> O              | 1.6 ±        | 0.5    | 0.53 ±   | 0.06   | 0.46   | 0.63   | 5             | 1.1 ±    | 0.3    | 0.56 ±   | 0.02   | 0.51                              | 0.59  | 11 | 0.60 ±   | 0.17   | 3 |
| MgO                            | 16 ±         | 5      | 16.9 ±   | 0.0    | 16.9   | 17.0   | 5             | 17 ±     | 5      | 17.2 ±   | 0.2    | 16.7                              | 17.6  | 11 | 16.7 ±   | 0.4    | 3 |
| Al <sub>2</sub> O <sub>3</sub> | 3.0 ±        | 0.9    | 0.65 ±   | 0.15   | 0.53   | 0.85   | 5             | 1.0 ±    | 0.3    | 0.58 ±   | 0.10   | 0.51                              | 0.87  | 11 | 0.54 ±   | 0.15   | 3 |
| SiO <sub>2</sub>               | 51 ±         | 15     | 55.1 ±   | 0.5    | 54.7   | 55.9   | 5             | 54 ±     | 16     | 54.3 ±   | 0.6    | 53.4                              | 55.2  | 11 | 54.1 ±   | 1.4    | 3 |
| P <sub>2</sub> O <sub>5</sub>  | 0.18 ±       | 0.05   | 0.04 ±   | 0.01   | <LOD   | 0.05   | 5             | 0.44 ±   | 0.13   | 0.04 ±   | 0.00   | <LOD                              | 0.05  | 11 |          |        |   |
| K <sub>2</sub> O               | 0.18 ±       | 0.05   |          |        |        |        |               | 0.10 ±   | 0.03   |          |        |                                   |       |    |          |        |   |
| CaO                            | 19 ±         | 6      | 22.2 ±   | 0.2    | 22.1   | 22.6   | 5             | 17 ±     | 5      | 22.1 ±   | 0.2    | 21.6                              | 22.4  | 11 | 22.0 ±   | 0.3    | 3 |
| TiO <sub>2</sub>               | 0.33 ±       | 0.10   | 0.44 ±   | 0.03   | 0.40   | 0.47   | 5             | 0.26 ±   | 0.08   | 0.49 ±   | 0.01   | 0.47                              | 0.51  | 11 | 0.43 ±   | 0.03   | 5 |
| V <sub>2</sub> O <sub>5</sub>  | 0.040 ±      | 0.012  | 0.06 ±   | 0.02   | 0.05   | 0.10   | 5             | 0.033 ±  | 0.010  | 0.05 ±   | 0.01   | <LOD                              | 0.07  | 11 | 0.046 ±  | 0.058  | 3 |
| Cr <sub>2</sub> O <sub>3</sub> | 0.57 ±       | 0.17   | 0.75 ±   | 0.08   | 0.68   | 0.84   | 5             | 0.50 ±   | 0.15   | 0.84 ±   | 0.04   | 0.76                              | 0.91  | 11 | 0.76 ±   | 0.15   | 6 |
| MnO                            | 0.24 ±       | 0.07   | 0.21 ±   | 0.01   | 0.19   | 0.22   | 5             | 0.27 ±   | 0.08   | 0.24 ±   | 0.02   | 0.21                              | 0.27  | 11 | 0.24 ±   | 0.01   | 6 |
| FeO                            | 7.4 ±        | 2.2    | 3.71 ±   | 0.23   | 3.45   | 3.95   | 5             | 8.5 ±    | 2.6    | 4.40 ±   | 0.42   | 3.99                              | 5.21  | 11 | 4.93 ±   | 0.37   | 3 |
| NiO                            | 0.34 ±       | 0.10   | 0.04 ±   | 0.01   | <LOD   | 0.06   | 5             | 0.46 ±   | 0.14   | 0.05 ±   | 0.04   | <LOD                              | 0.16  | 11 | 0.0025 ± | 0.0017 | 3 |
| ZnO                            | 0.0099 ±     | 0.0030 | <LOD     | <LOD   | <LOD   | <LOD   | 5             | 0.0085 ± | 0.0025 | <LOD     | <LOD   | <LOD                              | <LOD  | 11 |          |        |   |
| Total                          | 100.0 ±      | 17.2   | 100.7 ±  | 0.6    |        |        |               | 100.1 ±  | 17.9   | 100.8 ±  | 0.8    |                                   |       |    | 100.4 ±  | 1.6    |   |
| Fs                             |              |        | 0.06 ±   | 0.00   | 0.06   | 0.06   | 5             |          |        | 0.07 ±   | 0.01   | 0.06                              | 0.08  | 11 |          |        |   |
| Es                             |              |        | 0.48 ±   | 0.00   | 0.48   | 0.49   | 5             |          |        | 0.48 ±   | 0.00   | 0.48                              | 0.49  | 11 |          |        |   |
| Wo                             |              |        | 0.46 ±   | 0.00   | 0.45   | 0.46   | 5             |          |        | 0.45 ±   | 0.01   | 0.43                              | 0.46  | 11 |          |        |   |
| ( $\mu\text{g/g}$ )            |              |        |          |        |        |        |               |          |        |          |        |                                   |       |    |          |        |   |
| Sc                             | 71 ±         | 21     | 112 ±    | 11     | 101    | 124    | 2             | 59 ±     | 18     | 132 ±    | 5      | 126                               | 138   | 4  | 101 ±    | 65     | 4 |
| Co                             | 100 ±        | 30     |          |        |        |        |               | 180 ±    | 50     |          |        |                                   |       |    | 3 ±      | 1      | 3 |
| Cu                             | 49 ±         | 15     |          |        |        |        |               | 76 ±     | 23     |          |        |                                   |       |    |          |        |   |
| Zn                             | 80 ±         | 24     | 21 ±     | 5      | 16     | 26     | 2             | 68 ±     | 20     | 23 ±     | 4      | 19                                | 29    | 4  | 17 ±     | 6      | 4 |
| Rb                             | 3.7 ±        | 1.1    | 1.5 ±    | 0.2    | 1.5    | 1.5    | 1             | 2.8 ±    | 0.8    | 1.1 ±    | 0.1    | 1.0                               | 1.2   | 4  | 0.5      |        | 2 |
| Sr                             | 14 ±         | 4      | 10 ±     | 2      | 10     | 10     | 1             | 7.1 ±    | 2.1    | 6.4 ±    | 0.7    | 5.6                               | 7.0   | 4  | 17 ±     | 5      | 2 |
| Y                              | 4.5 ±        | 1.4    | 8.3 ±    | 0.9    | 7.5    | 9.2    | 2             | 4.6 ±    | 1.4    | 10 ±     | 1      | 9                                 | 12    | 4  | 5.1 ±    | 0.3    | 2 |
| Zr                             | 55 ±         | 16     |          |        |        |        |               | 57 ±     | 17     |          |        |                                   |       |    | 80 ±     | 30     | 2 |
| Nb                             | 1.0 ±        | 0.3    |          |        |        |        |               | 1.3 ±    | 0.4    |          |        |                                   |       |    |          |        |   |
| Ba                             | 4.9 ±        | 1.5    | 2.3 ±    | 0.3    | 2.3    | 2.3    | 1             | 4.7 ±    | 1.4    | 0.89 ±   | 0.21   | 0.70                              | 1.1   | 4  | 8 ±      | 2      | 2 |
| La                             | 0.61 ±       | 0.18   | 0.27 ±   | 0.02   | 0.26   | 0.29   | 2             | 0.54 ±   | 0.16   | 0.23 ±   | 0.03   | 0.22                              | 0.27  | 4  | 0.35 ±   | 0.32   | 3 |
| Ce                             | 1.7 ±        | 0.5    | 0.93 ±   | 0.04   | 0.89   | 0.97   | 2             | 7.5 ±    | 2.2    | 0.89 ±   | 0.07   | 0.85                              | 1.0   | 4  | 1.1 ±    | 0.4    | 3 |
| Pr                             | 0.22 ±       | 0.07   | 0.19 ±   | 0.01   | 0.18   | 0.20   | 2             | 0.26 ±   | 0.08   | 0.20 ±   | 0.01   | 0.19                              | 0.21  | 4  | 0.3 ±    | 0.0    | 2 |
| Nd                             | 1.0 ±        | 0.3    | 1.2 ±    | 0.1    | 1.1    | 1.2    | 2             | 1.3 ±    | 0.4    | 1.1 ±    | 0.1    | 1.1                               | 1.3   | 4  | 1.4 ±    | 0.2    | 2 |
| Sm                             | 0.38 ±       | 0.11   | 0.53 ±   | 0.00   | 0.53   | 0.53   | 2             | 0.40 ±   | 0.12   | 0.61 ±   | 0.07   | 0.55                              | 0.68  | 4  | 0.62 ±   | 0.49   | 3 |
| Eu                             | <LOD         |        | 0.091 ±  | 0.014  | 0.091  | 0.091  | 1             | <LOD     |        | 0.051 ±  | 0.002  | 0.049                             | 0.053 | 4  | 0.08 ±   | 0.11   | 3 |
| Gd                             | 0.54 ±       | 0.16   | 0.81 ±   | 0.05   | 0.76   | 0.87   | 2             | 0.74 ±   | 0.22   | 0.90 ±   | 0.14   | 0.79                              | 1.11  | 4  | 1.30     |        | 1 |
| Tb                             | 0.11 ±       | 0.03   | 0.18 ±   | 0.02   | 0.16   | 0.20   | 2             | 0.10 ±   | 0.03   | 0.19 ±   | 0.02   | 0.17                              | 0.21  | 4  | 0.23 ±   | 0.20   | 3 |
| Dy                             | 0.84 ±       | 0.25   | 1.4 ±    | 0.2    | 1.2    | 1.5    | 2             | 0.76 ±   | 0.23   | 1.5 ±    | 0.1    | 1.4                               | 1.5   | 4  |          |        |   |
| Ho                             | 0.18 ±       | 0.05   | 0.32 ±   | 0.03   | 0.28   | 0.35   | 2             | 0.16 ±   | 0.05   | 0.33 ±   | 0.05   | 0.29                              | 0.40  | 4  |          |        |   |
| Er                             | 0.60 ±       | 0.18   | 1.0 ±    | 0.1    | 0.9    | 1.1    | 2             | 0.44 ±   | 0.13   | 1.0 ±    | 0.1    | 1.0                               | 1.2   | 4  |          |        |   |
| Tm                             | 0.089 ±      | 0.027  | 0.16 ±   | 0.02   | 0.14   | 0.18   | 2             | 0.080 ±  | 0.024  | 0.16 ±   | 0.00   | 0.16                              | 0.17  | 4  | 0.31 ±   | 0.02   | 1 |
| Yb                             | 0.66 ±       | 0.20   | 1.2 ±    | 0.1    | 1.1    | 1.3    | 2             | 0.52 ±   | 0.16   | 1.1 ±    | 0.1    | 0.9                               | 1.2   | 4  | 0.98 ±   | 0.97   | 3 |
| Lu                             | 0.10 ±       | 0.03   | 0.19 ±   | 0.02   | 0.17   | 0.21   | 2             | 0.088 ±  | 0.026  | 0.17 ±   | 0.01   | 0.16                              | 0.18  | 4  | 0.21 ±   | 0.07   | 3 |
| Hf                             | 1.5 ±        | 0.5    | 2.5 ±    | 0.2    | 2.2    | 2.7    | 2             | 1.4 ±    | 0.4    | 2.3 ±    | 0.1    | 2.1                               | 2.4   | 4  |          |        |   |
| Ta                             | 0.063 ±      | 0.019  |          |        |        |        |               | 0.050 ±  | 0.015  |          |        |                                   |       |    |          |        |   |
| Pb                             | 2.5 ±        | 0.7    | 0.094 ±  | 0.014  | 0.094  | 0.094  | 1             | 3.2 ±    | 1.0    | 0.073 ±  | 0.056  | 0.036                             | 0.16  | 4  |          |        |   |
| Th                             | 0.090 ±      | 0.027  | 0.046 ±  | 0.005  | 0.042  | 0.051  | 2             | 0.11 ±   | 0.03   | 0.033 ±  | 0.019  | 0.020                             | 0.061 | 4  |          |        |   |
| U                              | <LOD         |        | 0.0077 ± | 0.0013 | 0.0065 | 0.0090 | 2             | <LOD     |        | 0.0048 ± | 0.0041 | 0.0023                            | 0.011 | 4  |          |        |   |

The uncertainties reported represent 30% relative uncertainty and 1SD for TOF and Spot, respectively. Where the number of analyses used for the average is two or one, the uncertainties reflect the range of the two values used for the average or 15% relative uncertainty, respectively. Literature values and their uncertainties represent the mean values of Ca-rich pyroxene in type 6 ordinary chondrites and the 95% confidence interval, respectively.<sup>9-12</sup> Where the number of analyses



used for the literature value is two or one, the uncertainties reflect the range of the two values used for the average or 1SD of the value, respectively. Values with more than 100% relative uncertainty are shown in red. LOD values for EPMA are 3SD of the blank intensities in % m/m: 0.01 for Na<sub>2</sub>O, 0.01 for MgO, 0.01 for Al<sub>2</sub>O<sub>3</sub>, 0.02 for SiO<sub>2</sub>, 0.04 for P<sub>2</sub>O<sub>5</sub>, 0.01 for CaO, 0.03 for TiO<sub>2</sub>, 0.03 for V<sub>2</sub>O<sub>5</sub>, 0.02 for Cr<sub>2</sub>O<sub>3</sub>, 0.02 for MnO, 0.02 for FeO, 0.03 for NiO, and 0.04 for ZnO. Where the abundance of an element was below the LOD for Spot, the LOD value is substituted instead of the abundance for the average unless every analysis is below the LOD.

## Supplementary Table 7.

Elemental abundances in **feldspar** (TOF: abundances obtained based on LA-ICP-TOF-MS mapping; Spot: average abundances obtained based on EPMA in % m/m and LA-ICP-SF-MS spot analysis in µg/g or ng/g; Min: the minimum abundances for Spot; Max: the maximum abundances for Spot; n: number of analyses and samples used for calculating the average in this study and literature values, respectively; <LOD: below the LOD).

| Meteorite                      | A 09618 (H5) |             |      |      |    |               | Y-790960 (H7) |      |      |    |             | Literature values <sup>9-12</sup> |  |  |
|--------------------------------|--------------|-------------|------|------|----|---------------|---------------|------|------|----|-------------|-----------------------------------|--|--|
|                                | TOF          | Spot        | Min  | Max  | n  | TOF           | Spot          | Min  | Max  | n  | Mean        | n                                 |  |  |
| (% m/m)                        |              |             |      |      |    |               |               |      |      |    |             |                                   |  |  |
| Na <sub>2</sub> O              | 6.7 ± 2.0    | 9.53 ± 0.53 | 8.41 | 10.1 | 13 | 9.6 ± 2.9     | 9.63 ± 0.42   | 8.92 | 10.2 | 24 | 9.7 ± 1.0   | 3                                 |  |  |
| MgO                            | 7.4 ± 2.2    | <LOD        | <LOD | <LOD | 13 | 4.6 ± 1.4     | <LOD          | <LOD | <LOD | 24 | 0.1         | 1                                 |  |  |
| Al <sub>2</sub> O <sub>3</sub> | 13 ± 4       | 22.3 ± 0.9  | 21.6 | 24.3 | 13 | 8.3 ± 2.5     | 21.8 ± 0.4    | 20.9 | 22.5 | 24 | 21.0 ± 0.5  | 3                                 |  |  |
| SiO <sub>2</sub>               | 57 ± 17      | 64.7 ± 1.7  | 62.4 | 66.4 | 13 | 59 ± 18       | 65.7 ± 0.7    | 64.5 | 66.7 | 24 | 65.3 ± 0.4  | 2                                 |  |  |
| P <sub>2</sub> O <sub>5</sub>  | 0.20 ± 0.06  | 0.07 ± 0.01 | <LOD | 0.09 | 13 | 0.29 ± 0.09   | 0.06 ± 0.00   | <LOD | 0.08 | 24 |             |                                   |  |  |
| K <sub>2</sub> O               | 0.80 ± 0.24  | 0.83 ± 0.29 | 0.37 | 1.09 | 13 | 0.89 ± 0.27   | 0.96 ± 0.30   | 0.49 | 1.46 | 24 | 0.99 ± 0.20 |                                   |  |  |
| CaO                            | 3.1 ± 0.9    | 2.69 ± 1.06 | 2.22 | 5.28 | 13 | <LOD          | 2.53 ± 0.13   | 2.20 | 2.66 | 24 | 2.1 ± 0.0   | 3                                 |  |  |
| TiO <sub>2</sub>               | 0.15 ± 0.05  | 0.05 ± 0.02 | <LOD | 0.08 | 13 | 0.070 ± 0.021 | 0.05 ± 0.02   | <LOD | 0.10 | 24 | 0.0520      | 3                                 |  |  |
| Cr <sub>2</sub> O <sub>3</sub> | 0.59 ± 0.18  | 0.06 ± 0.03 | <LOD | 0.13 | 13 | 0.28 ± 0.09   | <LOD          | <LOD | <LOD | 24 | 0.120       | 5                                 |  |  |
| MnO                            | 0.13 ± 0.04  | 0.05 ± 0.00 | <LOD | 0.06 | 13 | 0.10 ± 0.03   | 0.05 ± 0.00   | <LOD | 0.06 | 24 | 0.0         | 6                                 |  |  |
| FeO                            | 10 ± 3       | 0.68 ± 0.33 | 0.34 | 1.13 | 13 | 14 ± 4        | 0.39 ± 0.24   | 0.19 | 0.97 | 24 | 0.7 ± 0.2   | 2                                 |  |  |
| NiO                            | 1.1 ± 0.3    |             |      |      |    | 2.2 ± 0.7     |               |      |      |    | 0.0049      | 6                                 |  |  |
| Total                          | 99.9 ± 18.0  | 101.0 ± 2.3 |      |      |    | 99.7 ± 18.7   | 101.2 ± 1.0   |      |      |    | 99.7 ± 1.2  |                                   |  |  |
| An                             |              | 0.11 ± 0.04 | 0.09 | 0.19 | 13 |               | 0.09 ± 0.01   | 0.06 | 0.11 | 24 |             |                                   |  |  |
| Ab                             |              | 0.84 ± 0.03 | 0.79 | 0.86 | 13 |               | 0.85 ± 0.02   | 0.83 | 0.88 | 24 |             |                                   |  |  |
| Or                             |              | 0.05 ± 0.02 | 0.02 | 0.06 | 13 |               | 0.06 ± 0.02   | 0.03 | 0.09 | 24 |             |                                   |  |  |
| (µg/g)                         |              |             |      |      |    |               |               |      |      |    |             |                                   |  |  |
| Sc                             | 19 ± 6       |             |      |      |    | 18 ± 5        |               |      |      |    | 4.0 ± 2.3   | 4                                 |  |  |
| V                              | 110 ± 30     |             |      |      |    | 59 ± 18       |               |      |      |    | 22 ± 13     | 4                                 |  |  |
| Mn                             | 1000 ± 300   | 53 ± 8      | 53   | 53   | 1  | 790 ± 240     | 13 ± 6        | 8    | 19   | 2  | 262         | 6                                 |  |  |
| Co                             | 290 ± 90     |             |      |      |    | 710 ± 210     |               |      |      |    | 2.6 ± 2.5   | 6                                 |  |  |
| Cu                             | 90 ± 27      |             |      |      |    | 220 ± 70      |               |      |      |    | 5 ± 11      | 3                                 |  |  |
| Zn                             | 140 ± 40     | 4.1 ± 0.6   | 4.1  | 4.1  | 1  | 120 ± 40      | 5.4 ± 4.9     | 0.5  | 10   | 2  | 7 ± 6       | 6                                 |  |  |
| Rb                             | 16 ± 5       | 19 ± 3      | 19   | 19   | 1  | 36 ± 11       | 24 ± 1        | 23   | 26   | 2  | 25 ± 3      | 5                                 |  |  |
| Sr                             | 50 ± 15      | 104 ± 16    | 104  | 104  | 1  | 42 ± 13       | 91 ± 1        | 90   | 91   | 2  | 76 ± 9      | 3                                 |  |  |
| Y                              | 1.6 ± 0.5    | 0.11 ± 0.02 | 0.11 | 0.11 | 1  | 0.68 ± 0.20   | 0.47 ± 0.45   | 0.03 | 0.92 | 2  | 1           | 3                                 |  |  |
| Zr                             | 21 ± 6       |             |      |      |    | 24 ± 7        |               |      |      |    | 7 ± 4       | 3                                 |  |  |
| Nb                             | 1.0 ± 0.3    |             |      |      |    | 1.2 ± 0.4     |               |      |      |    |             |                                   |  |  |
| Ba                             | 15 ± 5       | 38 ± 6      | 38   | 38   | 1  | 17 ± 5        | 29 ± 1        | 29   | 30   | 2  | 41 ± 3      | 3                                 |  |  |
| (ng/g)                         |              |             |      |      |    |               |               |      |      |    |             |                                   |  |  |
| La                             | 840 ± 250    | 100 ± 15    | 100  | 100  | 1  | <LOD          | 170 ± 70      | 100  | 250  | 2  | 189 ± 38    | 2                                 |  |  |
| Ce                             | 1500 ± 500   | 130 ± 20    | 130  | 130  | 1  | 8100 ± 2400   | 290 ± 190     | 110  | 480  | 2  | 258 ± 26    | 2                                 |  |  |
| Pr                             | <LOD         | 10 ± 2      | 10   | 10   | 1  | <LOD          | 39 ± 29       | 9    | 68   | 2  |             |                                   |  |  |
| Nd                             | 600 ± 180    | 42 ± 6      | 42   | 42   | 1  | <LOD          | 210 ± 150     | 60   | 360  | 2  | 263 ± 32    | 2                                 |  |  |
| Sm                             | <LOD         | 8 ± 1       | 8    | 8    | 1  | <LOD          | 38 ± 35       | 14   | 73   | 2  | 100 ± 20    | 2                                 |  |  |
| Eu                             | 310 ± 90     | 740 ± 110   | 740  | 740  | 1  | 260 ± 80      | 630 ± 20      | 610  | 660  | 2  | 541 ± 87    | 3                                 |  |  |
| Gd                             | <LOD         | 11 ± 2      | 11   | 11   | 1  | <LOD          | 90 ± 80       | 10   | 170  | 2  |             |                                   |  |  |
| Tb                             | <LOD         | 2.2 ± 0.3   | 2.2  | 2.2  | 1  | <LOD          | 14 ± 13       | 1    | 27   | 2  | 23 ± 11     | 2                                 |  |  |
| Dy                             | 300 ± 90     | 19 ± 3      | 19   | 19   | 1  | <LOD          | 71 ± 68       | 3    | 140  | 2  |             |                                   |  |  |
| Ho                             | 72 ± 22      | 2.1 ± 0.3   | 2.1  | 2.1  | 1  | <LOD          | 16 ± 16       | 0    | 32   | 2  |             |                                   |  |  |
| Er                             | 230 ± 70     | 14 ± 2      | 14   | 14   | 1  | <LOD          | 56 ± 51       | 5    | 110  | 2  |             |                                   |  |  |
| Tm                             | <LOD         | 2 ± 0       | 2    | 2    | 1  | <LOD          | 8 ± 6         | 2    | 14   | 2  | 14 ± 1      | 1                                 |  |  |
| Yb                             | 230 ± 70     | 22 ± 3      | 22   | 22   | 1  | <LOD          | 41 ± 36       | 5    | 77   | 2  | 63 ± 13     | 2                                 |  |  |
| Lu                             | 46 ± 14      | 1.8 ± 0.3   | 1.8  | 1.8  | 1  | <LOD          | 4.4 ± 3.0     | 1.4  | 7.5  | 2  | 13 ± 0      | 2                                 |  |  |
| Hf                             | 350 ± 110    | 18 ± 3      | 18   | 18   | 1  | 180 ± 50      | 11 ± 1        | 10   | 12   | 2  |             |                                   |  |  |
| Ta                             | 80 ± 24      |             |      |      |    | 46 ± 14       |               |      |      |    |             |                                   |  |  |
| Pb                             | 4400 ± 100   | 83 ± 12     | 83   | 83   | 1  | 5700 ± 1700   | 35 ± 2        | 33   | 37   | 2  |             |                                   |  |  |
| Th                             | 73 ± 8       | 4.0 ± 0.6   | 4.0  | 4.0  | 1  | 110 ± 30      | 3.8 ± 2.1     | 1.8  | 5.9  | 2  |             |                                   |  |  |
| U                              | <LOD         | 2.4 ± 0.4   | 2.4  | 2.4  | 1  | <LOD          | 1.8 ± 1.0     | 0.8  | 2.8  | 2  |             |                                   |  |  |

The uncertainties reported represent 30% relative uncertainty and 1SD for TOF and Spot, respectively. Where the number

of analyses used for the average is two or one, the uncertainties reflect the range of the two values used for the average or 15% relative uncertainty, respectively. Literature values and their uncertainties represent the mean values of feldspar in type 6 ordinary chondrites and the 95% confidence interval, respectively, calculated excluding anomalously high or low abundances.<sup>9-12</sup> Where the number of analyses used for the literature value is two or one, the uncertainties reflect the range of the two values used for the average or 1SD of the value, respectively. Values with more than 100% relative uncertainty are shown in red. LOD values for EPMA analysis are 3SD of the blank intensities in % m/m: 0.03 for Na<sub>2</sub>O, 0.02 for MgO, 0.02 for Al<sub>2</sub>O<sub>3</sub>, 0.03 for SiO<sub>2</sub>, 0.06 for P<sub>2</sub>O<sub>5</sub>, 0.01 for K<sub>2</sub>O, 0.01 for CaO, 0.04 for TiO<sub>2</sub>, 0.04 for Cr<sub>2</sub>O<sub>3</sub>, 0.05 for MnO, and 0.04 for FeO. Where the abundance of an element was below the LOD for Spot, the LOD value is substituted instead of the abundance for the average unless every analysis is below the LOD.

Supplementary Table 8.

Elemental abundances in **low-Ca pyroxene** (TOF: abundances obtained based on LA-ICP-TOF-MS mapping; Spot: average abundances obtained based on EPMA in % m/m and LA-ICP-SF-MS spot analysis in  $\mu\text{g/g}$  or  $\text{ng/g}$ ; Min: the minimum abundances for Spot; Max: the maximum abundances for Spot; n number of analyses and samples used for calculating the average in this study and literature values, respectively; n.d.: not determined; <LOD: below the LOD).

| Meteorite                      | A 09618 (H5)  |             |      |      |   | Y-790960 (H7) |               |       |       |    | Literature values <sup>9-12</sup> |   |  |  |
|--------------------------------|---------------|-------------|------|------|---|---------------|---------------|-------|-------|----|-----------------------------------|---|--|--|
|                                | TOF           | Spot        | Min  | Max  | n | TOF           | Spot          | Min   | Max   | n  | Mean                              | n |  |  |
| (% m/m)                        |               |             |      |      |   |               |               |       |       |    |                                   |   |  |  |
| Na <sub>2</sub> O              | 0.58 ± 0.17   | 0.01 ± 0.01 | <LOD | 0.02 | 7 | 0.26 ± 0.08   | 0.01 ± 0.00   | <LOD  | 0.02  | 14 | <0.04                             | 3 |  |  |
| MgO                            | 27 ± 8        | 31.6 ± 0.2  | 31.2 | 31.8 | 7 | 25 ± 7        | 31.6 ± 0.1    | 31.3  | 31.8  | 14 | 29.3 ± 0.2                        | 3 |  |  |
| Al <sub>2</sub> O <sub>3</sub> | 1.3 ± 0.4     | 0.15 ± 0.01 | 0.12 | 0.16 | 7 | 0.32 ± 0.10   | 0.18 ± 0.02   | 0.15  | 0.24  | 14 | 0.11 ± 0.09                       | 3 |  |  |
| SiO <sub>2</sub>               | 56 ± 17       | 56.6 ± 0.3  | 56.0 | 56.8 | 7 | 60 ± 18       | 56.6 ± 0.2    | 56.3  | 56.9  | 14 | 55.6 ± 0.9                        | 3 |  |  |
| P <sub>2</sub> O <sub>5</sub>  | <LOD          | <LOD        | <LOD | <LOD | 7 | 0.12 ± 0.03   | <LOD          | <LOD  | <LOD  | 14 |                                   |   |  |  |
| K <sub>2</sub> O               | 0.11 ± 0.03   |             |      |      |   | 0.058 ± 0.017 |               |       |       |    |                                   |   |  |  |
| CaO                            | 1.3 ± 0.4     | 0.53 ± 0.04 | 0.50 | 0.61 | 7 | <LOD          | 0.68 ± 0.10   | 0.48  | 0.80  | 14 | 0.80 ± 0.22                       | 3 |  |  |
| TiO <sub>2</sub>               | 0.17 ± 0.05   | 0.16 ± 0.02 | 0.13 | 0.18 | 7 | 0.14 ± 0.04   | 0.18 ± 0.02   | 0.16  | 0.23  | 14 | 0.17 ± 0.01                       | 6 |  |  |
| Cr <sub>2</sub> O <sub>3</sub> | 0.22 ± 0.06   | 0.19 ± 0.16 | 0.08 | 0.43 | 7 | 0.15 ± 0.05   | 0.12 ± 0.01   | 0.10  | 0.15  | 14 | 0.17 ± 0.06                       | 6 |  |  |
| MnO                            | 0.50 ± 0.15   | 0.40 ± 0.03 | 0.36 | 0.45 | 7 | 0.47 ± 0.14   | 0.39 ± 0.02   | 0.36  | 0.42  | 14 | 0.46 ± 0.05                       | 6 |  |  |
| FeO                            | 12 ± 4        | 11.6 ± 0.0  | 11.5 | 11.6 | 7 | 13 ± 4        | 11.5 ± 0.1    | 11.3  | 11.8  | 14 | 13.9 ± 0.8                        | 3 |  |  |
| NiO                            | 0.21 ± 0.06   | 0.04 ± 0.01 | <LOD | 0.05 | 7 | 0.29 ± 0.09   | 0.04 ± 0.01   | <LOD  | 0.06  | 14 | 0.011 ± 0.009                     | 6 |  |  |
| ZnO                            | 0.013 ± 0.004 | <LOD        | <LOD | <LOD | 7 | 0.011 ± 0.003 | 0.04 ± 0.00   | <LOD  | 0.04  | 14 |                                   |   |  |  |
| Total                          | 99.9 ± 19.0   | 101.2 ± 0.4 |      |      |   | 99.4 ± 19.8   | 101.3 ± 0.3   |       |       |    | 100.5 ± 1.3                       |   |  |  |
| Fs                             |               | 0.17 ± 0.00 | 0.17 | 0.17 | 7 |               | 0.17 ± 0.00   | 0.16  | 0.17  | 14 |                                   |   |  |  |
| Es                             |               | 0.82 ± 0.00 | 0.82 | 0.82 | 7 |               | 0.82 ± 0.00   | 0.82  | 0.82  | 14 |                                   |   |  |  |
| Wo                             |               | 0.01 ± 0.00 | 0.01 | 0.01 | 7 |               | 0.01 ± 0.00   | 0.01  | 0.01  | 14 |                                   |   |  |  |
| ( $\mu\text{g/g}$ )            |               |             |      |      |   |               |               |       |       |    |                                   |   |  |  |
| Sc                             | 12 ± 4        | 4.0 ± 0.3   | 3.7  | 4.4  | 2 | 18 ± 5        | 11 ± 2        | 11    | 11    | 1  | 10 ± 2                            | 5 |  |  |
| V                              | 63 ± 19       |             |      |      |   | 54 ± 16       |               |       |       |    | 60 ± 29                           | 5 |  |  |
| Co                             | 63 ± 19       |             |      |      |   | 120 ± 40      |               |       |       |    | 11 ± 5                            | 6 |  |  |
| Cu                             | 35 ± 10       |             |      |      |   | 52 ± 16       |               |       |       |    | 10 ± 3                            | 6 |  |  |
| Zn                             | 100 ± 30      | 16 ± 2      | 13   | 18   | 2 | 90 ± 27       | 99 ± 15       | 99    | 99    | 1  | 38 ± 26                           | 6 |  |  |
| Rb                             | 1.6 ± 0.5     | n.d.        | n.d. | n.d. | 2 | 0.99 ± 0.30   | 0.050 ± 0.008 | 0.050 | 0.050 | 1  | 0.09 ± 0.1                        | 3 |  |  |
| Sr                             | 4.2 ± 1.3     | n.d.        | n.d. | n.d. | 2 | 2.2 ± 0.7     | 0.053 ± 0.008 | 0.053 | 0.053 | 1  | 4.5 ± 0.5                         | 2 |  |  |
| Y                              | 0.61 ± 0.18   | 0.23 ± 0.02 | 0.21 | 0.25 | 2 | 0.40 ± 0.12   | 0.36 ± 0.05   | 0.36  | 0.36  | 1  | 0.9 ± 0.1                         | 2 |  |  |
| Zr                             | 8.4 ± 2.5     |             |      |      |   | 16 ± 5        |               |       |       |    | 5 ± 1                             | 2 |  |  |
| Nb                             | 0.60 ± 0.18   |             |      |      |   | 0.60 ± 0.18   |               |       |       |    |                                   |   |  |  |
| Ba                             | 2.6 ± 0.8     | n.d.        | n.d. | n.d. | 2 | 3.4 ± 1.0     | 0.035 ± 0.005 | 0.035 | 0.035 | 1  | 2 ± 0                             | 2 |  |  |
| (ng/g)                         |               |             |      |      |   |               |               |       |       |    |                                   |   |  |  |
| La                             | <LOD          | 14 ± 3      | 10   | 17   | 2 | <LOD          | 6.3 ± 0.9     | 6.3   | 6.3   | 1  | 26 ± 3                            | 2 |  |  |
| Ce                             | 560 ± 170     | 36 ± 7      | 29   | 43   | 2 | 6300 ± 1900   | 33 ± 5        | 33    | 33    | 1  | 99 ± 39                           | 2 |  |  |
| Pr                             | <LOD          | 5.3 ± 1.0   | 4.2  | 6.3  | 2 | <LOD          | 1.1 ± 0.2     | 1.1   | 1.1   | 1  |                                   |   |  |  |
| Nd                             | <LOD          | 27 ± 3      | 24   | 30   | 2 | <LOD          | 2.5 ± 0.4     | 2.5   | 2.5   | 1  | 30 ± 3                            | 1 |  |  |
| Sm                             | <LOD          | 13 ± 1      | 12   | 14   | 2 | <LOD          | 12 ± 2        | 12    | 12    | 1  | 18 ± 4                            | 2 |  |  |
| Eu                             | <LOD          | n.d.        | n.d. | n.d. | 2 | <LOD          | <LOD          | <LOD  | <LOD  | 1  | 3 ± 2                             | 3 |  |  |
| Gd                             | <LOD          | 17 ± 1      | 16   | 17   | 2 | <LOD          | 10 ± 2        | 10    | 10    | 1  |                                   |   |  |  |
| Tb                             | <LOD          | 4.0 ± 0.3   | 3.7  | 4.3  | 2 | <LOD          | 2.9 ± 0.4     | 2.9   | 2.9   | 1  | 6 ± 2                             | 2 |  |  |
| Dy                             | <LOD          | 33 ± 6      | 27   | 40   | 2 | <LOD          | 44 ± 7        | 44    | 44    | 1  |                                   |   |  |  |
| Ho                             | <LOD          | 8.2 ± 0.6   | 7.6  | 8.7  | 2 | <LOD          | 11 ± 2        | 11    | 11    | 1  |                                   |   |  |  |
| Er                             | 93 ± 28       | 29 ± 3      | 26   | 31   | 2 | <LOD          | 45 ± 7        | 45    | 45    | 1  |                                   |   |  |  |
| Tm                             | <LOD          | 6 ± 1       | 5    | 7    | 2 | <LOD          | 12 ± 2        | 12    | 12    | 1  | 6 ± 0                             | 1 |  |  |
| Yb                             | <LOD          | 46 ± 8      | 38   | 53   | 2 | <LOD          | 120 ± 20      | 120   | 120   | 1  | 93 ± 2                            | 2 |  |  |
| Lu                             | <LOD          | 8.5 ± 1.2   | 7.2  | 9.7  | 2 | <LOD          | 19 ± 3        | 19    | 19    | 1  | 31 ± 7                            | 5 |  |  |
| Hf                             | 170 ± 50      | 88 ± 12     | 77   | 100  | 2 | 270 ± 80      | 24 ± 4        | 24    | 24    | 1  |                                   |   |  |  |
| Ta                             | 40 ± 12       |             |      |      |   | <LOD          |               |       |       |    |                                   |   |  |  |
| Pb                             | 2500 ± 800    | 59 ± 1      | 58   | 60   | 2 | 3500 ± 1100   | 34 ± 5        | 34    | 34    | 1  |                                   |   |  |  |
| Th                             | 90 ± 27       | 82 ± 41     | 42   | 120  | 2 | 61 ± 18       | 7.1 ± 1.1     | 7.1   | 7.1   | 1  |                                   |   |  |  |
| U                              | <LOD          | 15 ± 8      | 7    | 23   | 2 | <LOD          | 1.6 ± 0.2     | 1.6   | 1.6   | 1  |                                   |   |  |  |

The uncertainties reported represent 30% relative uncertainty and 1SD for TOF and Spot, respectively. Where the number

of analyses used for the average is two or one, the uncertainties reflect the range of the two values used for the average or 15% relative uncertainty, respectively. Literature values and their uncertainties represent the mean values of low-Ca pyroxene in type 6 ordinary chondrites and the 95% confidence interval, respectively, calculated excluding anomalously high abundances.<sup>9-12</sup> Where the number of analyses used for the literature value is two or one, the uncertainties reflect the range of the two values used for the average or 1SD of the value, respectively. Values with more than 100% relative uncertainty are shown in red. LOD values for EPMA are 3SD of the blank intensities in % m/m: 0.01 for Na<sub>2</sub>O, 0.01 for MgO, 0.01 for Al<sub>2</sub>O<sub>3</sub>, 0.02 for SiO<sub>2</sub>, 0.04 for P<sub>2</sub>O<sub>5</sub>, 0.01 for CaO, 0.03 for TiO<sub>2</sub>, 0.03 for V<sub>2</sub>O<sub>5</sub>, 0.02 for Cr<sub>2</sub>O<sub>3</sub>, 0.02 for MnO, 0.02 for FeO, 0.03 for NiO, and 0.04 for ZnO. Where the abundance of an element was below the LOD for Spot, the LOD value is substituted instead of the abundance for the average unless every analysis is below the LOD.

Supplementary Table 9.

Elemental abundances in **olivine** (TOF: abundances obtained based on LA-ICP-TOF-MS mapping; Spot: average abundances obtained based on EPMA in % m/m and LA-ICP-SF-MS spot analysis in  $\mu\text{g/g}$  or  $\text{ng/g}$ ; Min: the minimum abundances for Spot; Max: the maximum abundances for Spot; n: number of analyses and samples used for calculating the average in this study and literature values, respectively; n.d.: not determined; <LOD: below the LOD).

| Meteorite                      | A 09618 (H5)  |               |       |       |   | Y-790960 (H7) |             |      |      |   | Literature values <sup>9-12</sup> |   |
|--------------------------------|---------------|---------------|-------|-------|---|---------------|-------------|------|------|---|-----------------------------------|---|
|                                | TOF           | Spot          | Min   | Max   | n | TOF           | Spot        | Min  | Max  | n | Mean                              | n |
| (% m/m)                        |               |               |       |       |   |               |             |      |      |   |                                   |   |
| Na <sub>2</sub> O              | 0.22 ± 0.07   | 0.01 ± 0.00   | <LOD  | 0.02  | 9 | 0.15 ± 0.04   | 0.01 ± 0.00 | <LOD | 0.01 | 8 | <0.03                             | 3 |
| MgO                            | 40 ± 12       | 43.6 ± 0.5    | 42.7  | 44.2  | 9 | 38 ± 11       | 43.8 ± 0.2  | 43.5 | 44.1 | 8 | 39.5 ± 0.5                        | 3 |
| Al <sub>2</sub> O <sub>3</sub> | 0.52 ± 0.16   | 0.04 ± 0.08   | <LOD  | 0.25  | 9 | 0.12 ± 0.04   | <LOD        | <LOD | <LOD | 8 | <0.02                             | 3 |
| SiO <sub>2</sub>               | 39 ± 12       | 39.3 ± 0.3    | 38.9  | 39.7  | 9 | 42 ± 13       | 39.6 ± 0.2  | 39.2 | 39.8 | 8 | 38.1 ± 0.5                        | 3 |
| P <sub>2</sub> O <sub>5</sub>  | <LOD          | 0.05 ± 0.02   | <LOD  | 0.09  | 9 | <LOD          | 0.07 ± 0.06 | <LOD | 0.22 | 8 |                                   |   |
| K <sub>2</sub> O               | 0.060 ± 0.018 |               |       |       |   | 0.038 ± 0.011 |             |      |      |   |                                   |   |
| CaO                            | 0.36 ± 0.11   | 0.01 ± 0.00   | <LOD  | 0.02  | 9 | 0.15 ± 0.04   | 0.02 ± 0.01 | <LOD | 0.05 | 8 | <0.01                             | 3 |
| TiO <sub>2</sub>               | 0.023 ± 0.007 | 0.05 ± 0.05   | <LOD  | 0.15  | 9 | 0.011 ± 0.003 | <LOD        | <LOD | <LOD | 8 | 0.023 ± 0.030                     | 3 |
| Cr <sub>2</sub> O <sub>3</sub> | 0.074 ± 0.022 | 0.05 ± 0.02   | <LOD  | 0.08  | 9 | 0.049 ± 0.015 | <LOD        | <LOD | <LOD | 8 | 0.056 ± 0.022                     | 6 |
| MnO                            | 0.49 ± 0.15   | 0.35 ± 0.03   | 0.32  | 0.40  | 9 | 0.47 ± 0.14   | 0.36 ± 0.04 | 0.28 | 0.41 | 8 | 0.46 ± 0.04                       | 6 |
| FeO                            | 19 ± 6        | 18.4 ± 0.2    | 18.2  | 18.7  | 9 | 19 ± 6        | 18.5 ± 0.2  | 18.2 | 19.0 | 8 | 22.6 ± 1.2                        | 3 |
| NiO                            | 0.18 ± 0.05   | <LOD          | <LOD  | <LOD  | 9 | 0.26 ± 0.08   | 0.06 ± 0.06 | <LOD | 0.20 | 8 | 0.019 ± 0.013                     | 6 |
| ZnO                            | 0.015 ± 0.005 | <LOD          | <LOD  | <LOD  | 9 | 0.012 ± 0.004 | <LOD        | <LOD | <LOD | 8 |                                   |   |
| Total                          | 99.9 ± 17.7   | 101.9 ± 0.6   |       |       |   | 99.9 ± 17.8   | 102.5 ± 0.4 |      |      |   | 100.8 ± 1.4                       |   |
| Fa                             |               | 0.19 ± 0.00   | 0.19  | 0.20  | 9 |               | 0.19 ± 0.00 | 0.19 | 0.20 | 8 |                                   |   |
| Fo                             |               | 0.81 ± 0.00   | 0.80  | 0.81  | 9 |               | 0.81 ± 0.00 | 0.80 | 0.81 | 8 |                                   |   |
| ( $\mu\text{g/g}$ )            |               |               |       |       |   |               |             |      |      |   |                                   |   |
| Sc                             | <LOD          |               |       |       |   | 10 ± 3        |             |      |      |   | 4 ± 3                             | 6 |
| V                              | 12 ± 4        |               |       |       |   | 23 ± 7        |             |      |      |   | 16 ± 14                           | 6 |
| Mn                             | 3800 ± 1100   | 3267 ± 338    | 2929  | 3605  | 2 | 3600 ± 1100   | 3849 ± 143  | 3694 | 3976 | 3 | 3563 ± 295                        | 6 |
| Co                             | 61 ± 18       |               |       |       |   | 110 ± 30      |             |      |      |   | 19 ± 15                           | 6 |
| Cu                             | 30 ± 9        |               |       |       |   | 26 ± 8        |             |      |      |   | 12 ± 9                            | 3 |
| Zn                             | 120 ± 40      | 49 ± 2        | 48    | 51    | 2 | 99 ± 30       | 57 ± 3      | 55   | 61   | 3 | 40 ± 25                           | 6 |
| Rb                             | <LOD          | 0.25 ± 0.06   | 0.18  | 0.31  | 2 | <LOD          | 0.20 ± 0.03 | 0.20 | 0.20 | 1 | <0.05                             | 3 |
| Sr                             | 1.9 ± 0.6     | 0.17 ± 0.10   | 0.07  | 0.26  | 2 | 1.5 ± 0.4     | 0.30 ± 0.05 | 0.30 | 0.30 | 1 | 0.7 ± 0.3                         | 2 |
| Y                              | <LOD          | 0.064 ± 0.021 | 0.043 | 0.084 | 2 | <LOD          | 0.24 ± 0.11 | 0.13 | 0.35 | 2 | <0.5                              | 1 |
| Zr                             | 2.4 ± 0.7     |               |       |       |   | 11 ± 3        |             |      |      |   | <4                                | 2 |
| Nb                             | 0.40 ± 0.12   |               |       |       |   | <LOD          |             |      |      |   |                                   |   |
| Ba                             | 1.5 ± 0.5     | 0.078 ± 0.023 | 0.055 | 0.10  | 2 | 2.5 ± 0.7     | 0.14 ± 0.02 | 0.14 | 0.14 | 1 | <0.8                              | 3 |
| (ng/g)                         |               |               |       |       |   |               |             |      |      |   |                                   |   |
| La                             | <LOD          | 12 ± 0        | 12    | 13    | 2 | <LOD          | 23 ± 3      | 20   | 25   | 2 | 11 ± 5                            | 3 |
| Ce                             | <LOD          | 59 ± 33       | 26    | 92    | 2 | 5400 ± 1600   | 59 ± 11     | 48   | 70   | 2 | 26 ± 21                           | 3 |
| Pr                             | <LOD          | 2.8 ± 0.1     | 2.7   | 2.8   | 2 | <LOD          | 9.1 ± 3.8   | 5.3  | 13   | 2 |                                   |   |
| Nd                             | <LOD          | 11 ± 1        | 10    | 13    | 2 | <LOD          | 46 ± 20     | 26   | 66   | 2 | <31                               | 2 |
| Sm                             | <LOD          | 3 ± 0         | 3     | 4     | 2 | <LOD          | 15 ± 5      | 10   | 20   | 2 | 5 ± 6                             | 3 |
| Eu                             | <LOD          | 1.0 ± 0.2     | 0.8   | 1.2   | 2 | <LOD          | 11 ± 2      | 11   | 11   | 1 | <1                                | 3 |
| Gd                             | <LOD          | 10 ± 2        | 7     | 12    | 2 | <LOD          | 29 ± 15     | 14   | 43   | 2 |                                   |   |
| Tb                             | <LOD          | 1.6 ± 0.5     | 1.1   | 2.1   | 2 | <LOD          | 6.0 ± 3.8   | 2.2  | 9.8  | 2 | 1 ± 1                             | 3 |
| Dy                             | <LOD          | 9.1 ± 1.8     | 7.3   | 11    | 2 | <LOD          | 39 ± 19     | 20   | 57   | 2 |                                   |   |
| Ho                             | <LOD          | 3.0 ± 0.9     | 2.1   | 3.9   | 2 | <LOD          | 8.4 ± 3.1   | 5.4  | 11   | 2 |                                   |   |
| Er                             | <LOD          | 10 ± 1        | 9     | 11    | 2 | <LOD          | 31 ± 12     | 19   | 44   | 2 |                                   |   |
| Tm                             | <LOD          | 2 ± 1         | 2     | 3     | 2 | <LOD          | 7 ± 3       | 4    | 9    | 3 | 1 ± 0                             | 2 |
| Yb                             | <LOD          | 19 ± 1        | 18    | 21    | 2 | <LOD          | 46 ± 2      | 44   | 49   | 3 | 11 ± 9                            | 3 |
| Lu                             | <LOD          | 4.9 ± 1.2     | 3.7   | 6.1   | 2 | <LOD          | 8.8 ± 1.6   | 7.8  | 11   | 3 | 4 ± 1                             | 3 |
| Hf                             | <LOD          | 55 ± 7        | 48    | 61    | 2 | 170 ± 50      | 5 ± 1       | 5    | 5    | 1 |                                   |   |
| Ta                             | <LOD          |               |       |       |   | <LOD          |             |      |      |   |                                   |   |
| Pb                             | 2000 ± 600    | 71 ± 11       | 71    | 71    | 1 | 3000 ± 900    | 36 ± 6      | 33   | 43   | 3 |                                   |   |
| Th                             | <LOD          | 5.2 ± 2.3     | 2.9   | 7.5   | 2 | <LOD          | 6.3 ± 0.9   | 6.3  | 6.3  | 1 |                                   |   |
| U                              | <LOD          | 2.0 ± 0.5     | 1.6   | 2.5   | 2 | <LOD          | 2.7 ± 0.3   | 2.4  | 3.1  | 2 |                                   |   |

The uncertainties reported represent 30% relative uncertainty and 1SD for TOF and Spot, respectively. Where the number

of analyses used for the average is two or one, the uncertainties reflect the range of the two values used for the average or 15% relative uncertainty, respectively. Literature values and their uncertainties represent the mean values of olivine in type 6 ordinary chondrites and the 95% confidence interval, respectively, calculated excluding anomalously high abundances.<sup>9-</sup>  
<sup>12</sup> Where the number of analyses used for the literature value is two or one, the uncertainties reflect the range of the two values used for the average or 1SD of the value, respectively. Values with more than 100% relative uncertainty are shown in red. LOD values for EPMA are 3SD of the blank intensities in % m/m: 0.01 for Na<sub>2</sub>O, 0.01 for MgO, 0.01 for Al<sub>2</sub>O<sub>3</sub>, 0.02 for SiO<sub>2</sub>, 0.04 for P<sub>2</sub>O<sub>5</sub>, 0.01 for CaO, 0.03 for TiO<sub>2</sub>, 0.03 for V<sub>2</sub>O<sub>5</sub>, 0.02 for Cr<sub>2</sub>O<sub>3</sub>, 0.02 for MnO, 0.02 for FeO, 0.03 for NiO, and 0.04 for ZnO. Where the abundance of an element was below the LOD for Spot, the LOD value is substituted instead of the abundance for the average unless every analysis is below the LOD.

Supplementary Table 10.

Elemental abundances in **oxides** (TOF: abundances obtained based on LA-ICP-TOF-MS mapping; Spot: average abundances obtained based on EPMA in % m/m; Min: the minimum abundances for Spot; Max: the maximum abundances for Spot; n: number of analyses and samples used for calculating the average in this study and literature values, respectively; n.d.: not determined; <LOD: below the LOD).

| Mineral/<br>Meteorite          | Chromite/A 09618 (H5) |       |        |      |      |      | Chromite/Y-790960 (H7) |         |        |        |      | Chromite/Literature values <sup>9-12</sup> |      | Ilmenite/Y-790960 (H7) |        |      |         |          |        |         |      |      |      |   |
|--------------------------------|-----------------------|-------|--------|------|------|------|------------------------|---------|--------|--------|------|--------------------------------------------|------|------------------------|--------|------|---------|----------|--------|---------|------|------|------|---|
|                                | TOF                   | Spot  | Min    | Max  | n    | TOF  | Spot                   | Min     | Max    | n      | Mean | n                                          | TOF  | Spot                   | Min    | Max  | n       |          |        |         |      |      |      |   |
| (% m/m)                        |                       |       |        |      |      |      |                        |         |        |        |      |                                            |      |                        |        |      |         |          |        |         |      |      |      |   |
| Na <sub>2</sub> O              | 0.38 ±                | 0.11  | 0.01 ± | 0.00 | <LOD | 0.02 | 9                      | 0.22 ±  | 0.07   | 0.01 ± | 0.00 | <LOD                                       | 0.02 | 9                      | n.d.   | 3    | <LOD    | <LOD     | <LOD   | <LOD    | 3    |      |      |   |
| MgO                            | 4.3 ±                 | 1.3   | 3.26 ± | 0.18 | 3.09 | 3.52 | 9                      | 3.6 ±   | 1.1    | 3.29 ± | 0.13 | 3.05                                       | 3.45 | 9                      | 2.50 ± | 0.00 | 3       | 3.9 ±    | 1.2    | 5.04 ±  | 0.12 | 4.91 | 5.14 | 3 |
| Al <sub>2</sub> O <sub>3</sub> | 8.8 ±                 | 2.7   | 6.63 ± | 0.18 | 6.38 | 6.99 | 9                      | 4.9 ±   | 1.5    | 6.73 ± | 0.06 | 6.65                                       | 6.81 | 9                      | 5.7 ±  | 0.5  | 3       | 0.056 ±  | 0.017  | 0.02 ±  | 0.01 | <LOD | 0.03 | 3 |
| SiO <sub>2</sub>               | 5.9 ±                 | 1.8   | 0.03 ± | 0.01 | <LOD | 0.04 | 9                      | 6.4 ±   | 1.9    | 0.04 ± | 0.03 | <LOD                                       | 0.11 | 9                      | <0.11  | 3    | 2.2 ±   | 0.7      | 0.03 ± | 0.00    | 0.03 | 0.04 | 3    |   |
| P <sub>2</sub> O <sub>5</sub>  | <LOD                  |       | <LOD   | <LOD | <LOD | 9    | 0.30 ±                 | 0.09    | <LOD   | <LOD   | <LOD | 9                                          |      |                        |        |      | 0.11 ±  | 0.03     | <LOD   | <LOD    | <LOD | 3    |      |   |
| K <sub>2</sub> O               | 0.086 ±               | 0.026 |        |      |      |      |                        | 0.096 ± | 0.029  |        |      |                                            |      |                        |        |      | 0.032 ± | 0.010    |        |         |      |      |      |   |
| CaO                            | <LOD                  |       | 0.02 ± | 0.01 | <LOD | 0.06 | 9                      | <LOD    |        | 0.02 ± | 0.00 | <LOD                                       | 0.03 | 9                      | n.d.   | 2    | <LOD    |          | 0.01 ± | 0.00    | <LOD | 0.02 | 3    |   |
| TiO <sub>2</sub>               | 1.7 ±                 | 0.5   | 2.26 ± | 0.16 | 1.88 | 2.41 | 9                      | 1.3 ±   | 0.4    | 2.30 ± | 0.04 | 2.23                                       | 2.35 | 9                      | 2.8 ±  | 0.4  | 6       | 41 ±     | 12     | 55.6 ±  | 0.4  | 55.2 | 55.9 | 3 |
| V <sub>2</sub> O <sub>5</sub>  | 0.62 ±                | 0.19  |        |      |      |      |                        | 0.51 ±  | 0.15   |        |      |                                            |      |                        | 0.50 ± | 0.19 | 6       | 0.022 ±  | 0.007  | <LOD    | <LOD | <LOD | 3    |   |
| Cr <sub>2</sub> O <sub>3</sub> | 38 ±                  | 12    | 56.7 ± | 0.5  | 56.0 | 57.3 | 9                      | 47 ±    | 14     | 56.3 ± | 0.3  | 55.8                                       | 56.8 | 9                      | 55.1 ± | 1.0  | 6       | 0.053 ±  | 0.016  | 0.07 ±  | 0.01 | 0.06 | 0.08 | 3 |
| MnO                            | 0.85 ±                | 0.26  | 0.72 ± | 0.03 | 0.68 | 0.77 | 9                      | 0.78 ±  | 0.23   | 0.66 ± | 0.04 | 0.63                                       | 0.73 | 9                      | 0.64 ± | 0.08 | 6       | 2.1 ±    | 0.6    | 2.53 ±  | 0.12 | 2.40 | 2.64 | 3 |
| FeO                            | 37 ±                  | 11    | 29.4 ± | 0.3  | 29.0 | 29.8 | 9                      | 34 ±    | 10     | 29.5 ± | 0.2  | 29.3                                       | 29.9 | 9                      | 31.0 ± | 1.5  | 3       | 49 ±     | 15     | 39.2 ±  | 0.2  | 39.0 | 39.3 | 3 |
| NiO                            | 0.74 ±                | 0.22  | <LOD   | <LOD | <LOD | 9    | 0.65 ±                 | 0.19    | 0.04 ± | 0.00   | <LOD | 0.04                                       | 9    | 0.038 ±                | 0.043  | 5    | 1.2 ±   | 0.4      | <LOD   | <LOD    | <LOD | 3    |      |   |
| ZnO                            | 0.19 ±                | 0.06  | 0.35 ± | 0.04 | 0.32 | 0.43 | 9                      | 0.43 ±  | 0.13   | 0.34 ± | 0.04 | 0.29                                       | 0.41 | 9                      |        |      |         | 0.0085 ± | 0.0025 | <LOD    | <LOD | <LOD | 3    |   |
| Total                          | 99.2 ±                | 16.4  | 99.5 ± | 0.6  |      |      |                        | 99.8 ±  | 17.5   | 99.3 ± | 0.4  |                                            |      |                        | 98.0 ± | 1.9  |         | 99.9 ±   | 19.3   | 102.5 ± | 0.5  |      |      |   |
| (µg/g)                         |                       |       |        |      |      |      |                        |         |        |        |      |                                            |      |                        |        |      |         |          |        |         |      |      |      |   |
| Sc                             | <LOD                  |       |        |      |      |      |                        | <LOD    |        |        |      |                                            |      |                        | 3.4 ±  | 1.9  | 5       | <LOD     |        |         |      |      |      |   |
| V                              | 4200 ±                | 1300  |        |      |      |      |                        | 3500 ±  | 1100   |        |      |                                            |      |                        | 3417 ± | 1260 | 6       | 150 ±    | 50     |         |      |      |      |   |
| Co                             | 240 ±                 | 70    |        |      |      |      |                        | 270 ±   | 80     |        |      |                                            |      |                        | 35 ±   | 9    | 5       | 890 ±    | 270    |         |      |      |      |   |
| Cu                             | 73 ±                  | 22    |        |      |      |      |                        | 96 ±    | 29     |        |      |                                            |      |                        | 227 ±  | 548  | 3       | 39 ±     | 12     |         |      |      |      |   |
| Zn                             | 1500 ±                | 500   |        |      |      |      |                        | 3400 ±  | 1000   |        |      |                                            |      |                        | 2200 ± | 994  | 3       | 68 ±     | 20     |         |      |      |      |   |
| Rb                             | <LOD                  |       |        |      |      |      |                        | <LOD    |        |        |      |                                            |      |                        | <0.2   |      | 1       | <LOD     |        |         |      |      |      |   |
| Sr                             | 4.3 ±                 | 1.3   |        |      |      |      |                        | 3.2 ±   | 0.9    |        |      |                                            |      |                        | 7 ±    | 3    | 3       | 4.3 ±    | 1.3    |         |      |      |      |   |
| Y                              | <LOD                  |       |        |      |      |      |                        | <LOD    |        |        |      |                                            |      |                        | <0.5   |      | 2       | <LOD     |        |         |      |      |      |   |
| Zr                             | 5.9 ±                 | 1.8   |        |      |      |      |                        | 32 ±    | 10     |        |      |                                            |      |                        | 3 ±    | 4    | 3       | 29 ±     | 9      |         |      |      |      |   |
| Nb                             | 1.2 ±                 | 0.4   |        |      |      |      |                        | 1.1 ±   | 0.3    |        |      |                                            |      |                        |        |      |         | 320 ±    | 100    |         |      |      |      |   |
| Ba                             | 2.5 ±                 | 0.7   |        |      |      |      |                        | 5.7 ±   | 1.7    |        |      |                                            |      |                        | 1.4 ±  | 0.6  | 2       | 7.0 ±    | 2.1    |         |      |      |      |   |
| Hf                             | 0.11 ±                | 0.03  |        |      |      |      |                        | 0.46 ±  | 0.14   |        |      |                                            |      |                        |        |      |         | 1.0 ±    | 0.3    |         |      |      |      |   |
| Ta                             | 0.042 ±               | 0.013 |        |      |      |      |                        | <LOD    |        |        |      |                                            |      |                        |        |      |         | 13 ±     | 4      |         |      |      |      |   |

The uncertainties reported represent 30% relative uncertainty and 1SD for TOF and Spot, respectively. Literature values and their uncertainties represent the mean values of chromite in type 6 ordinary chondrites and the 95% confidence interval, respectively, calculated excluding anomalously high or low abundances.<sup>9-12</sup> Where the number of analyses used for the literature value is two or one, the uncertainties reflect the range of the two values used for the average or 1SD of the value, respectively. Values with more than 100% relative uncertainty are shown in red. LOD values for EPMA are 3SD of the blank intensities in % m/m: 0.01 for Na<sub>2</sub>O, 0.01 for MgO, 0.01 for Al<sub>2</sub>O<sub>3</sub>, 0.02 for SiO<sub>2</sub>, 0.04 for P<sub>2</sub>O<sub>5</sub>, 0.01 for CaO, 0.03 for TiO<sub>2</sub>, 0.03 for V<sub>2</sub>O<sub>5</sub>, 0.02 for Cr<sub>2</sub>O<sub>3</sub>, 0.02 for MnO, 0.02 for FeO, 0.03 for NiO, and 0.04 for ZnO. Where the abundance of an element was below the LOD for Spot, the LOD value is substituted instead of the abundance for the average unless every analysis is below the LOD.



## References

1. K.P. Jochum, M. Willbold, I. Raczek, B. Stoll and K. Herwig, *Geostand. Geoanal. Res.*, 2005, **29**, 285–302.
2. K.P. Jochum, B. Stoll, K.P. Herwig, M. Willbold, A.W. Hofmann, M. Amini and 47 coauthors, *Geochem. Geophys. Geosyst.*, 2006, **7**, Q02008.
3. M.A.W. Marks, T. Wenzel, M.J. Whitehouse, M. Loose, T. Zack, M. Barth, L. Worgard, V. Krasz, G.N. Eby, H. Stosnach and G. Markl, *Chem. Geol.*, 2012, **291**, 241-255.
4. L.-K. Sha and W. Chappell, *Geochim. Cosmochim. Acta*, 1999, **63**, 3861-3881.
5. M. Tanner, *J. Anal. At. Spectrom.*, 2010, **25**, 405–407.
6. R. Maeda, S. Goderis, V. Debaille, H. Pourkhorsandi, G. Hublet and P. Claeys, *Geochim. Cosmochim. Acta*, 2021, **305**, 106-129.
7. J.T. Wasson and G.W. Kallemeyn, *Philos. Trans. R. Soc. Lond.*, 1988, **A 325**, 535-544.
8. D. Ward, A. Bischoff, J. Roszjar and M.J. Whitehouse, *American Mineralogist*, 2017, **102**, 1856-1880.
9. B. Mason and A.L. Graham, *Earth Sci.*, 1970, **3**, 1-17.
10. R.O. Allen Jr. and B. Mason, *Geochim. Cosmochim. Acta*, 1973, **37**, 1435-1456.
11. D.B. Curtis, Ph.D. Thesis, Oregon State University, Oregon, 1974.
12. D.B. Curtis and R.A. Schmitt, *Geochim. Cosmochim. Acta*, 1979, **43**, 1091-1103.
